# Supplementary material for: Long-wavelength dual-state luminescent naphthalimide derivatives for bio-imaging
Source: Royal Society of Chemistry journal article supplement (doi:10.1039/d4tc01855a), 2024-01-01
Supplement: d4tc01855a1.pdf [file d4tc01855a1.pdf]

## Supporting Information

### Long-wavelength dual-state luminescent naphthalimide derivatives for bio-imaging

Yiran Li,<sup>a,b</sup> Glib V. Baryshnikov,<sup>\*c</sup> Smruti Ranjan Sahoo,<sup>c,d</sup> Zhenni Lu,<sup>b</sup> Lulu Zhou,<sup>e</sup> Lingyan Liu,<sup>b</sup> Wei Feng,<sup>a</sup> Liangliang Zhu,<sup>e</sup> Peng Wei,<sup>b</sup> Hongwei Wu<sup>\*b</sup> and Tao Yi<sup>\*a,b</sup>

---

<sup>a</sup> Department of Chemistry, Fudan University, Shanghai 200433, China.

<sup>b</sup> State Key Laboratory for Modification of Chemical Fiber and Polymer Materials, Key Lab of Science and Technology of Eco-Textile, Ministry of Education, College of Chemistry and Chemical Engineering, Donghua University, Shanghai 201620, China.

<sup>c</sup> Laboratory of Organic Electronics, Department of Science and Technology, Linköping University, Norrköping 60174, Sweden.

<sup>d</sup> Department of Physics and Astronomy, Uppsala University Box 516, SE-75120 Uppsala, Sweden.

<sup>e</sup> State Key Laboratory of Molecular Engineering of Polymers, Department of Macromolecular Science, Fudan University, Shanghai 200433, China.

Corresponding Authors: [yitao@fudan.edu.cn](mailto:yitao@fudan.edu.cn) [wuhongwei@dhu.edu.cn](mailto:wuhongwei@dhu.edu.cn) [glib.baryshnikov@liu.se](mailto:glib.baryshnikov@liu.se)

## Contents

|                                             |    |
|---------------------------------------------|----|
| 1. Synthesis.....                           | 3  |
| 2. Experimental methods.....                | 6  |
| 2.1 Materials and instrumentations.....     | 6  |
| 2.2 Preparation of coassembly films.....    | 7  |
| 2.3 Preparation of F-127 nanoparticles..... | 7  |
| 2.4 Cytotoxicity assay.....                 | 7  |
| 2.5 Cell Culture and Staining.....          | 7  |
| 3. Computational details.....               | 8  |
| 4. Additional figures and images.....       | 9  |
| 5. Additional tables.....                   | 19 |
| 6. NMR and HRMS spectra.....                | 29 |
| 7. Reference.....                           | 36 |

## 1. Synthesis

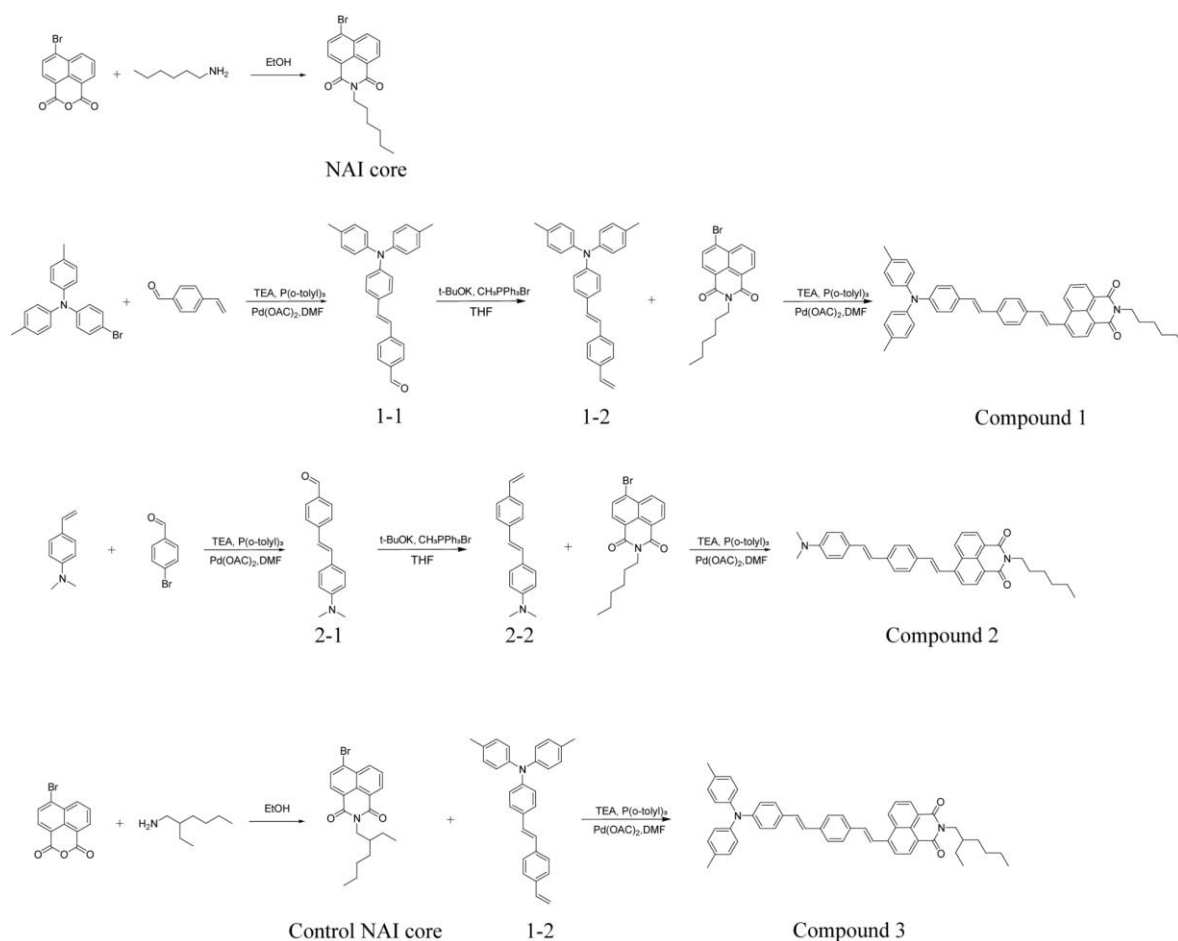

**Scheme S1.** Synthetic routes to compounds **1-3**.

The NAI and control NAI cores were synthesized according to reported procedures.<sup>1, 2</sup>

Synthesis of compound **1-1**: A flask was charged with a mixture of 4-bromo-N,N-diphenylbenzylamine (1.47 g, 4.16 mmol), 4-vinylbenzaldehyde (0.50 g, 3.78 mmol), Pd(OAc)<sub>2</sub> (8.5 mg, 0.038 mmol), P(o-tolyl)<sub>3</sub> (52 mg, 0.19 mmol), DMF (10 mL), and triethylamine (3.0 mL). The reaction mixture was stirred at 100 °C for 24 h under nitrogen atmosphere. Upon cooling to room temperature, the solution was poured into water and extracted with DCM. The organic layer was dried with anhydrous sodium sulfate and concentrated by vacuum evaporation. The crude product was purified by silica-gel column chromatography using PE/DCM (1/1) as an eluent to obtain the desired compound as yellow solid (0.82 g) with a yield of 53.9%. **<sup>1</sup>H NMR** (400 MHz, CDCl<sub>3</sub>, δ): 9.97 (s, 1H), 7.84 (d, J = 8.1 Hz, 2H), 7.61 (d, J = 8.1 Hz, 2H), 7.37 (d, J = 8.5 Hz, 2H), 7.20 (d, J = 16.3 Hz, 1H), 7.09 (d, J = 8.2 Hz, 4H), 7.05-6.95 (m, 7H), 2.33 (s, 6H); **<sup>13</sup>C NMR** (101 MHz, CDCl<sub>3</sub>, δ): 191.55, 148.69, 144.82, 144.04, 133.20, 131.93, 130.25, 130.00, 127.74, 126.54, 125.11, 124.81, 121.69, 20.85; **HRMS** (ESI) *m/z*: [M + H]<sup>+</sup> calcd for C<sub>29</sub>H<sub>26</sub>NO<sup>+</sup> 404.2009; found: 404.2009.

Synthesis of compound **1-2**: A mixture of 1-1 (0.70 g, 1.74 mmol), potassium tert-butyrate (0.58 g, 5.21 mmol), and  $\text{CH}_3\text{PPh}_3\text{Br}$  (1.55 g, 4.35 mmol) in dry THF (50 mL) was stirred at 0 °C for 4 h under nitrogen atmosphere. After vacuum distillation of the reaction mixture to remove part of THF, the solution was poured into water and extracted with DCM. The organic layer was dried with anhydrous sodium sulfate and concentrated by vacuum evaporation. The crude product was purified by silica-gel column chromatography using PE/DCM (4/1) as an eluent to obtain the desired compound as a yellow solid (0.43 g) with a yield of 63.5%.  **$^1\text{H}$  NMR** (400 MHz,  $\text{CDCl}_3$ ,  $\delta$ ): 7.44 (d,  $J = 8.2$  Hz, 2H), 7.38 (d,  $J = 8.2$  Hz, 2H), 7.34 (d,  $J = 8.6$  Hz, 2H), 7.07 (d,  $J = 8.2$  Hz, 4H), 7.04-6.91 (m, 7H), 6.71 (dd,  $J = 17.5, 10.8$  Hz, 1H), 5.75 (d,  $J = 17.4$  Hz, 1H), 5.23 (d,  $J = 11.0$  Hz, 1H), 2.32 (s, 6H);  **$^{13}\text{C}$  NMR** (101 MHz,  $\text{CDCl}_3$ ,  $\delta$ ): 136.52, 132.76, 131.08, 129.90, 128.26, 127.22, 126.52, 126.40, 124.80, 123.48, 122.35, 113.41, 20.81; **HRMS** (ESI)  $m/z$ :  $[\text{M}]$  calcd for  $\text{C}_{30}\text{H}_{27}\text{N}$  401.2143; found: 401.2144.

Synthesis of compound **1**: A flask was charged with a mixture of **1-2** (0.30 g, 0.77 mmol), NAI core (0.30 g, 0.85 mmol),  $\text{Pd}(\text{OAc})_2$  (1.8 mg, 0.008 mmol),  $\text{P}(\text{o-tolyl})_3$  (10 mg, 0.039 mmol), DMF (10 mL), and triethylamine (3.0 mL). The reaction mixture was stirred at 100 °C for 24 h under nitrogen atmosphere. Upon cooling to room temperature, the solution was poured into water and extracted with DCM. The organic layer was dried with anhydrous sodium sulfate and concentrated by vacuum evaporation. The crude product was purified by silica-gel column chromatography using PE/DCM (2/1) as an eluent to obtain the desired compound as an orange solid (0.21 g) with a yield of 40.1%.  **$^1\text{H}$  NMR** (400 MHz,  $\text{DMSO-}d_6$ ,  $\delta$ ): 9.04 (d,  $J = 9.1$  Hz, 1H), 8.56 (d,  $J = 7.1$  Hz, 1H), 8.50 (d,  $J = 7.6$  Hz, 1H), 8.31-8.21 (m, 2H), 7.93 (t,  $J = 8.2$  Hz, 1H), 7.87 (d,  $J = 8.6$  Hz, 2H), 7.67-7.61 (m, 3H), 7.49 (d,  $J = 8.3$  Hz, 2H), 7.29 (d,  $J = 16.7$  Hz, 1H), 7.14 (d,  $J = 8.1$  Hz, 5H), 6.95 (d,  $J = 8.4$  Hz, 4H), 6.89 (d,  $J = 8.2$  Hz, 2H), 4.09-4.02 (m, 2H), 2.28 (s, 6H), 1.70-1.58 (m, 2H), 1.37-1.27 (m, 6H), 0.87 (t,  $J = 6.3$  Hz, 3H);  **$^{13}\text{C}$  NMR** (101 MHz,  $\text{CDCl}_3$ ,  $\delta$ ) 164.29, 164.06, 148.12, 145.00, 141.46, 138.56, 135.37, 135.05, 133.81, 132.93, 131.17, 131.08, 130.18, 129.96, 129.59, 129.17, 128.77, 127.52, 127.39, 126.92, 126.74, 125.65, 124.91, 123.81, 123.22, 122.90, 122.12, 121.45, 40.52, 31.58, 28.10, 26.83, 22.58, 20.85, 14.07; **HRMS** (ESI)  $m/z$ :  $[\text{M} + \text{H}]^+$  calcd for  $\text{C}_{48}\text{H}_{45}\text{N}_2\text{O}_2^+$  681.3476; found: 681.3476.

Synthesis of compound **2-1**: A flask was charged with a mixture of *N,N*-dimethyl-4-vinylbenzenamine (0.50 g, 3.40 mmol), 4-bromobenzaldehyde (0.69 g, 3.75 mmol),  $\text{Pd}(\text{OAc})_2$  (7.5 mg, 0.034 mmol),  $\text{P}(\text{o-tolyl})_3$  (47 mg, 0.17 mmol), DMF (10 mL), and triethylamine (3.0 mL). The reaction mixture was stirred at 100 °C for 24 h under nitrogen atmosphere. Upon cooling to room temperature, the solution was poured into water and extracted with DCM. The

organic layer was dried with anhydrous sodium sulfate and concentrated by vacuum evaporation. The crude product was purified by silica-gel column chromatography using PE/DCM (2/1) as an eluent to obtain the desired compound as a yellow solid (0.45 g) with a yield of 58.6%. **<sup>1</sup>H NMR** (400 MHz, DMSO-*d*<sub>6</sub>, δ): 9.94 (s, 1H), 7.86 (d, J = 8.3 Hz, 2H), 7.74 (d, J = 8.3 Hz, 2H), 7.50 (d, J = 8.8 Hz, 2H), 7.37 (d, J = 16.4 Hz, 1H), 7.08 (d, J = 16.4 Hz, 1H), 6.75 (d, J = 8.9 Hz, 2H), 2.96 (s, 6H); **<sup>13</sup>C NMR** (101 MHz, CDCl<sub>3</sub>, δ): 191.59, 134.74, 132.18, 132.14, 132.04, 130.27, 128.51, 128.26, 126.41, 40.95; **HRMS** (ESI) *m/z*: [M + H]<sup>+</sup> calcd for C<sub>17</sub>H<sub>18</sub>NO<sup>+</sup> 252.1383; found: 252.1383.

Synthesis of compound **2-2**: A mixture of **2-1** (0.30 g, 1.19 mmol), potassium tert-butyrate (0.40 g, 3.58 mmol), and CH<sub>3</sub>PPh<sub>3</sub>Br (1.07 g, 2.98 mmol) in dry THF (50 mL) was stirred at 0 °C for 4 h under nitrogen atmosphere. After vacuum distillation of the reaction mixture to remove part of THF, the solution was poured into water and extracted with DCM. The organic layer was dried with anhydrous sodium sulfate and concentrated by vacuum evaporation. The crude product was purified by silica-gel column chromatography using PE/DCM (5/1) as an eluent to obtain the desired compound as a pale-yellow solid (0.25 g) with a yield of 83.7%. **<sup>1</sup>H NMR** (400 MHz, DMSO-*d*<sub>6</sub>, δ): 7.50 (d, J = 8.3 Hz, 2H), 7.43 (d, J = 9.1 Hz, 4H), 7.14 (d, J = 16.4 Hz, 1H), 6.96 (d, J = 16.4 Hz, 1H), 6.76-6.67 (m, 3H), 5.82 (d, J = 17.5 Hz, 1H), 5.23 (d, J = 11.3 Hz, 1H), 2.94 (s, 6H); **<sup>13</sup>C NMR** (101 MHz, CDCl<sub>3</sub>, δ): 137.75, 136.56, 135.95, 128.73, 127.57, 126.45, 126.10, 113.07, 112.48, 112.45, 40.47; **HRMS** (ESI) *m/z*: [M + H]<sup>+</sup> calcd for C<sub>18</sub>H<sub>20</sub>N<sup>+</sup> 250.1590; found: 250.1590.

Synthesis of compound **2**: A flask was charged with a mixture of **2-2** (0.20 g, 0.80 mmol), NAI core (0.32 g, 0.88 mmol), Pd(OAc)<sub>2</sub> (1.8 mg, 0.008 mmol), P(*o*-tolyl)<sub>3</sub> (11 mg, 0.04 mmol), DMF (10 mL), and triethylamine (3.0 mL). The reaction mixture was stirred at 100 °C for 24 h under nitrogen atmosphere. Upon cooling to room temperature, the solution was poured into water and extracted with DCM. The organic layer was dried with anhydrous sodium sulfate and concentrated by vacuum evaporation. The crude product was purified by silica-gel column chromatography using PE/DCM (1/1) as an eluent to obtain the desired compound as an orange solid (0.12 g) with a yield of 28.6%. **<sup>1</sup>H NMR** (400 MHz, DMSO-*d*<sub>6</sub>, δ): 9.04 (d, J = 8.4 Hz, 1H), 8.55 (d, J = 6.8 Hz, 1H), 8.49 (d, J = 7.8 Hz, 1H), 8.25 (dd, J = 18.4, 12.0 Hz, 2H), 7.95-7.88 (m, 1H), 7.85 (d, J = 8.3 Hz, 2H), 7.66-7.58 (m, 3H), 7.47 (d, J = 8.8 Hz, 2H), 7.25 (d, J = 16.4 Hz, 1H), 7.03 (d, J = 16.4 Hz, 1H), 6.74 (d, J = 8.9 Hz, 2H), 4.08-3.99 (m, 2H), 2.95 (s, 6H), 1.68-1.59 (m, 2H), 1.30 (d, J = 8.1 Hz, 6H), 0.87 (t, J = 6.9 Hz, 3H); **<sup>13</sup>C NMR** (101 MHz, CDCl<sub>3</sub>, δ): 164.27, 164.04, 144.56, 141.49, 138.93, 135.10, 134.89, 131.12, 131.05, 129.93, 129.59, 129.53, 128.73, 127.75, 127.47, 126.61, 126.46, 123.70, 123.14, 122.53, 121.31,

120.67, 118.39, 112.52, 40.56, 40.47, 31.54, 28.06, 26.79, 22.55, 14.04; **HRMS** (ESI)  $m/z$ :  $[M + H]^+$  calcd for  $C_{36}H_{37}N_2O_2^+$  529.2850; found: 529.2850.

**Synthesis of compound 3:** A flask was charged with a mixture of **1-2** (0.30 g, 0.77 mmol), Control NAI core (0.33 g, 0.85 mmol),  $Pd(OAc)_2$  (1.8 mg, 0.008 mmol),  $P(o\text{-tolyl})_3$  (10 mg, 0.039 mmol), DMF (10 mL), and triethylamine (3.0 mL). The reaction mixture was stirred at 100 °C for 24 h under nitrogen atmosphere. Upon cooling to room temperature, the solution was poured into water and extracted with DCM. The organic layer was dried with anhydrous sodium sulfate and concentrated by vacuum evaporation. The crude product was purified by silica-gel column chromatography using PE/DCM (2/1) as an eluent to obtain the desired compound as an orange solid (0.16 g) with a yield of 29.4%.  **$^1H$  NMR** (400 MHz,  $DMSO-d_6$ ,  $\delta$ ): 9.04 (d,  $J = 8.8$  Hz, 1H), 8.54 (dd,  $J = 22.9, 7.4$  Hz, 2H), 8.31-8.21 (m, 2H), 8.01-7.78 (m, 4H), 7.78-7.57 (m, 4H), 7.49 (d,  $J = 8.8$  Hz, 2H), 7.28 (d,  $J = 15.8$  Hz, 2H), 7.13 (t,  $J = 7.8$  Hz, 4H), 6.92 (dd,  $J = 25.8, 8.4$  Hz, 4H), 4.01 (t,  $J = 6.8$  Hz, 2H), 2.28 (s, 6H), 1.87 (s, 1H), 1.42-1.19 (m, 8H), 0.86 (dt,  $J = 13.8, 7.2$  Hz, 6H);  **$^{13}C$  NMR** (101 MHz,  $CDCl_3$ ,  $\delta$ ) 164.69, 164.46, 148.12, 145.00, 141.42, 138.56, 135.36, 135.03, 133.24, 132.93, 131.25, 131.16, 130.17, 129.96, 129.57, 129.17, 128.81, 127.52, 127.39, 127.06, 126.74, 125.65, 124.91, 123.82, 123.20, 122.87, 122.12, 121.43, 44.20, 37.97, 30.81, 28.75, 24.12, 23.10, 20.85, 14.11, 10.69; **HRMS** (ESI)  $m/z$ :  $[M + H]^+$  calcd for  $C_{50}H_{49}N_2O_2^+$  709.3789; found: 709.3789.

## 2. Experimental methods

### 2.1 Materials and instrumentations

4-Bromo-1,8-naphthalic anhydride, hexan-1-amine, methyltriphenylphosphonium bromide, 2-ethylhexan-1-amine, palladium diacetate, tri-*o*-tolylphosphine, potassium *tert*-butanolate, sodium *tert*-butanolate, *N,N*-dimethyl-4-vinylbenzenamine, triethylamine, 4-bromobenzaldehyde and 4-bromo-*N,N*-dip-tolylbenzenamine were all purchased from Adamas-beta®. All reagents were used as received without any further purification.

$^1H$  NMR and  $^{13}C$  NMR were measured on a Bruker 400 MHz spectrometer. High-resolution mass spectra (HRMS) were carried out on a Bruker Micro TOF II 10257 instrument with the electro-spray ionization (ESI) technique and direct injection method. Absorption spectra were recorded on a Shimadzu 1800 spectrophotometer, while the fluorescent spectra were taken with an Edinburgh FLS1000 spectrofluorometer. The fluorescent lifetimes were measured using an Edinburgh FLS1000 spectrofluorometer with a time-correlated single photon counting technique. The quantum yields of samples were measured on a Hamamatsu Photonics C11347-11 with a Quantaaurus-QY measurement system. TEM images were captured on a Hitachi

HT7700 Exa-lens using transmission electron microscopy with an acceleration voltage of 120 kV by dropping the solution onto a carbon-coated copper grid. Dynamic light scattering (DLS) experiments were carried out with a Nano-Zeta Potential Analyzer ZS-90. The confocal microscope was performed on a Lecia DMI8 fluorescence microscopy. The photos were taken by Canon EDS 90D camera or Huawei P20 Pro phone.

## **2.2 Preparation of coassembly films**

PMMA (5 g) was added to chloroform (100 mL), which was stirred at room temperature for 10 min. Small organic molecules with 1 mg/mL in THF were added to the prepared PMMA solution (10 mL). The obtained solutions were then ultrasonicated at room temperature for about 20 min for a full coassembly. Dropping the solutions (about 0.5 mL) on quartz glass and keeping them at 80 °C for 5 min resulted in the coassembly films.

## **2.3 Preparation of F-127 nanoparticles**

Compound **1** (0.1 mg) in THF (2 mL) and F-127 (10 mg) in deionized water (5 mL) were mixed in a flask followed by sonication for 30 minutes. THF was evaporated by reduced pressure. The solution was filtered through a 0.22 µm microfilter to obtain the NPs solution.

## **2.4 Cytotoxicity assay**

HeLa cells were seeded in a 96-well plate with culture media (DMEM). After growing for 24 h in the well, different concentrations of NPs were added and incubated for 24 h. The MTT assay was conducted using 0.5 mg/mL of MTT (sigma) media. MTT media was added to the cells for 4 h, and the formazan produced was dissolved in 0.1 mL of dimethylsulfoxide (DMSO). The absorbance at 570 nm was determined using a microplate reader (Bio Tek Instruments, Inc). The cell viability was calculated as the ratio of the average absorbance of samples to that of control.

## **2.5 Cell Culture and Staining**

HeLa cells were cultivated in the standard culture media at 37 °C for 24 h. Then the culture media was changed into standard culture media containing various concentration NPs, and cells were incubated for 4 h. After that, the cells were washed carefully with PBS for three times to remove free NPs suspended in the media and ready for fluorescence imaging. HeLa cells incubated with NPs, and HeLa cells pretreated with nystatin for 30 min and then stained with NPs for 4 hours at 37 °C. After that, the cells were washed carefully with PBS for three times to remove free NPs suspended in the media and ready for fluorescence lifetime imaging and fluorescence imaging. Fluorescence intensities were quantified from region of interests in the cells by an imaging J software.

### 3. Computational details

Ground state molecular structures of naphthalimide core-based materials were optimized in gas phase by using DFT/B3LYP/6-31G(d) level of theory.<sup>3,4</sup> Becke three-parameter hybrid functional (B3LYP) was found to be a well-performing method for charge transport and photophysical properties of naphthalimide derivatives.<sup>5-7</sup> The resulted minimized geometry is then considered as initial guess for the geometry optimization at the same level of theory within the polarizable continuum model (PCM). We used the time-dependent density functional theory (TD-DFT)<sup>8,9</sup> to calculate the  $S_0 \rightarrow S_1$  vertical absorption, and  $S_1 \rightarrow S_0$  vertical emission of compounds. Both calculations were investigated with the same solvation model as was used for optimized ground state  $S_0$  geometry. The same method B3LYP/6-31G(d) was employed for TD-DFT calculations. In addition, the highest occupied molecular orbital (HOMO) and lowest unoccupied molecular orbital (LUMO) distributions for the  $S_1$  and  $S_2$  excited states were investigated. All computational calculations were performed using the quantum chemistry package Gaussian 16 (Rev. B. 01).<sup>10</sup>



#### 4. Additional figures and images

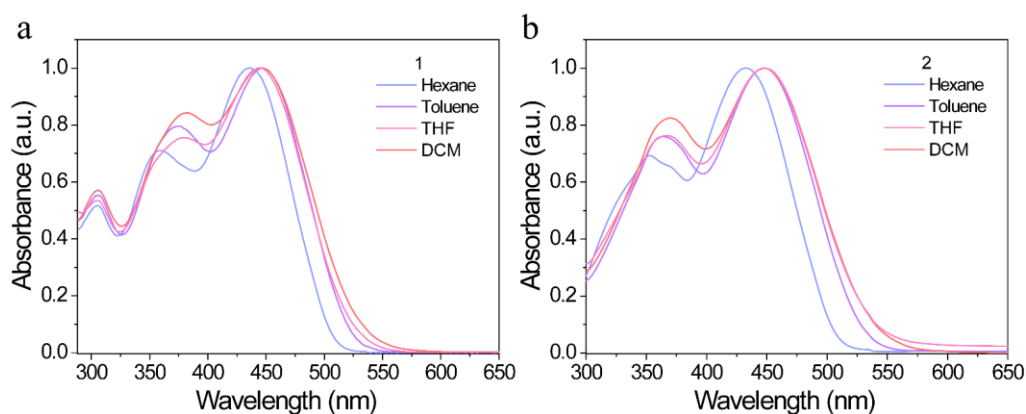

Figure S1. Normalized absorption spectra of (a) **1** and (b) **2** in different solvents. The concentration is 10  $\mu\text{M}$ .

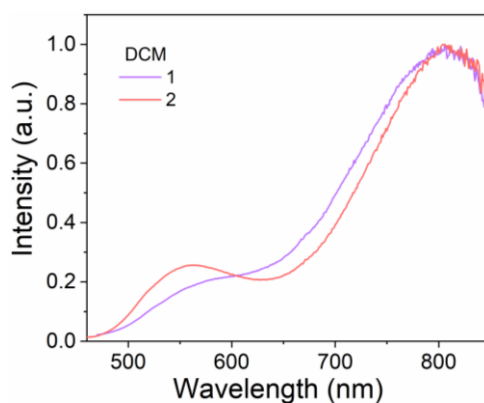

Figure S2. Normalized fluorescence spectra of **1** and **2** in DCM measured by PMT detector at room temperature. The excitation wavelength is 450 nm. The concentration is 10  $\mu\text{M}$ .

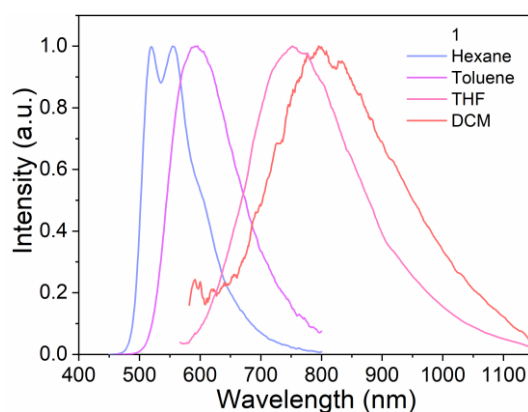

Figure S3. Normalized fluorescence spectra of **1** in different solvents at room temperature. The excitation wavelength is 380 nm. The concentration is 10  $\mu\text{M}$ . The emissions in hexane and toluene were measured by the PMT detector, and the emissions in DCM and THF were measured by NIR detector.

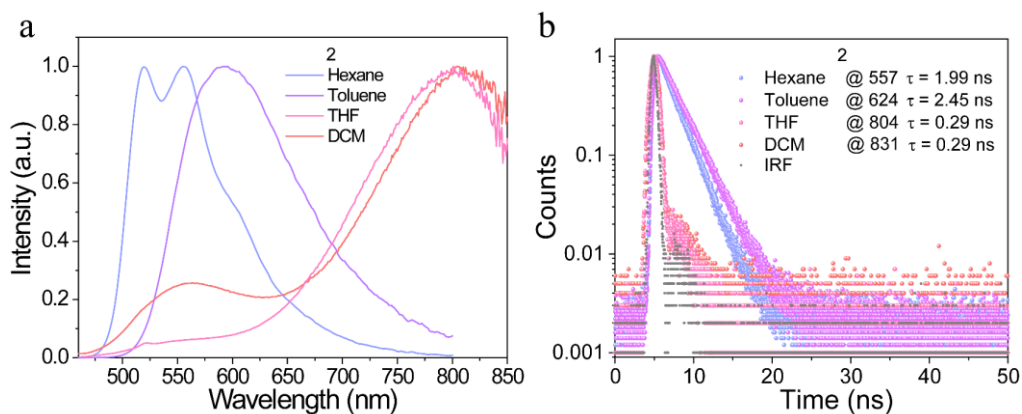

Figure S4. (a) Fluorescence (measured by PMT detector) spectra and (b) fluorescence decay of **2** in different solvents. The concentration is  $10 \mu\text{M}$ . The excitation wavelength is 380 nm.

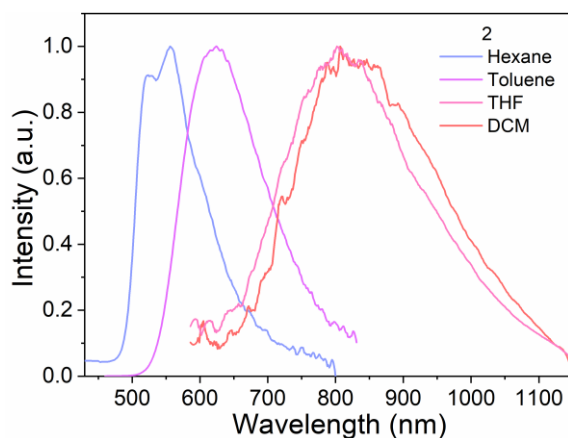

Figure S5. Normalized fluorescence spectra of **2** in different solvents at room temperature. The excitation wavelength is 380 nm. The concentration is  $10 \mu\text{M}$ . The emissions in hexane and toluene were measured by PMT detector, and the emissions in DCM and THF were measured by NIR detector.

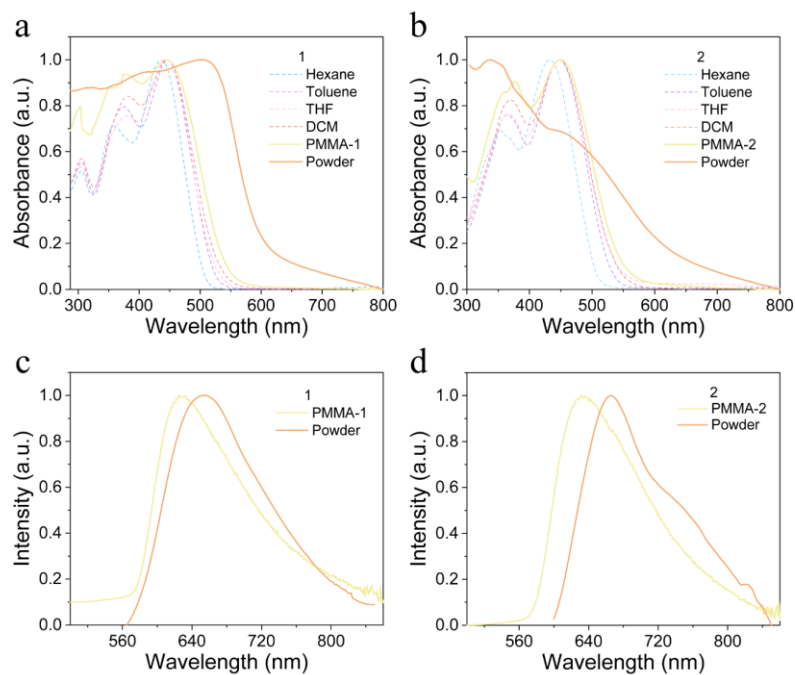

Figure S6. Normalized absorption spectra of **1** and **2** in different states (a and b). The concentration is  $10\ \mu\text{M}$ . Normalized fluorescence spectra of **1** and **2** in different states at room temperature (c and d). The excitation wavelength is  $450\ \text{nm}$ .

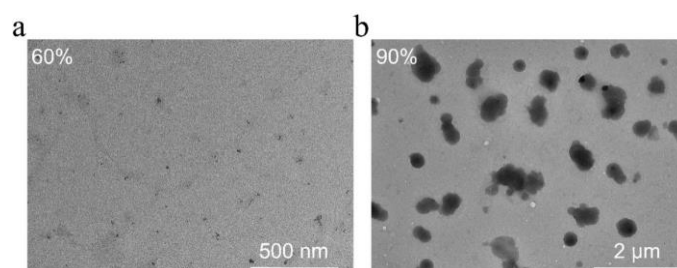

Figure S7. TEM images of compound **1** in THF/ $\text{H}_2\text{O}$  with 60% (a) and 90% (b) water fractions.

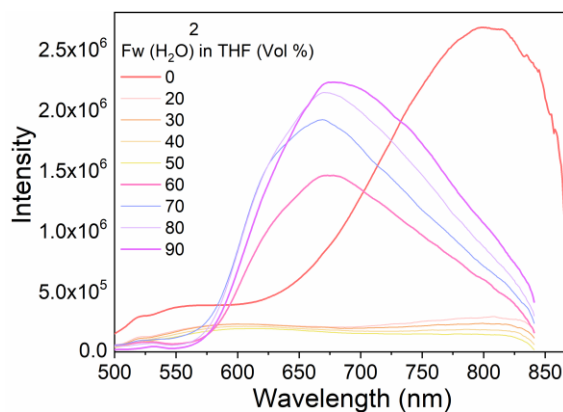

Figure S8. Fluorescence spectra of compound **2** ( $10\ \mu\text{M}$ ) in THF/ $\text{H}_2\text{O}$  with different water fractions. The excitation wavelength is  $450\ \text{nm}$ .

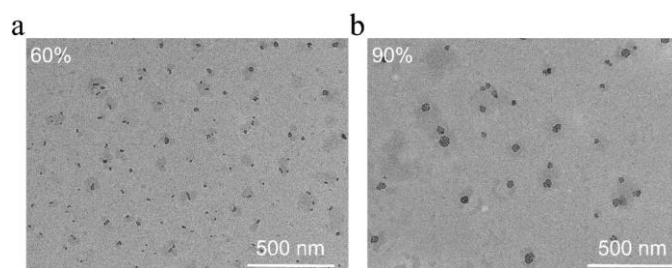

Figure S9. TEM images of compound **2** in THF/H<sub>2</sub>O with water fractions of 60% (a) and 90% (b).

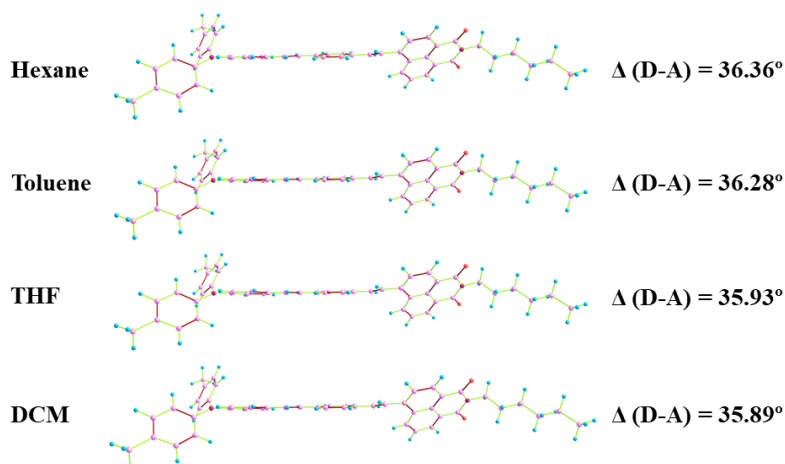

Figure S10. Ground state spatial configuration of **1** in different solvents with the dihedral angle,  $\Delta(\text{D-A})$ , between the donor (D) and the acceptor (A). Here, in DA structures, electronic donors are shown as planar layers.

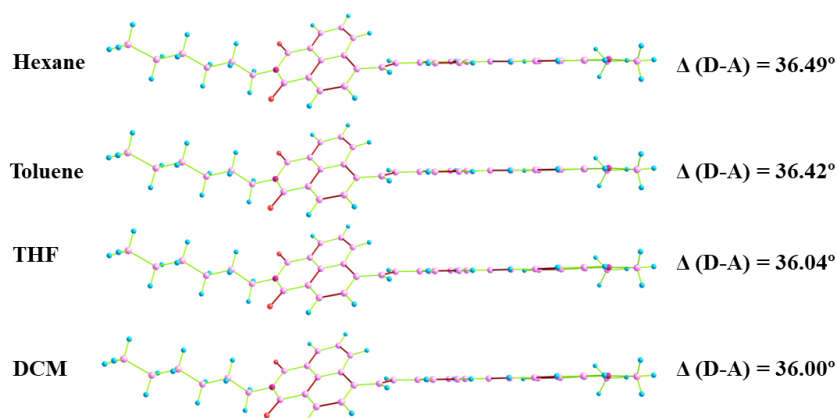

Figure S11. Ground state spatial configuration of **2** in different solvents with the dihedral angle,  $\Delta(\text{D-A})$ , between the donor (D) and the acceptor (A). Here, in DA structures, electronic donors are shown as planar layers.

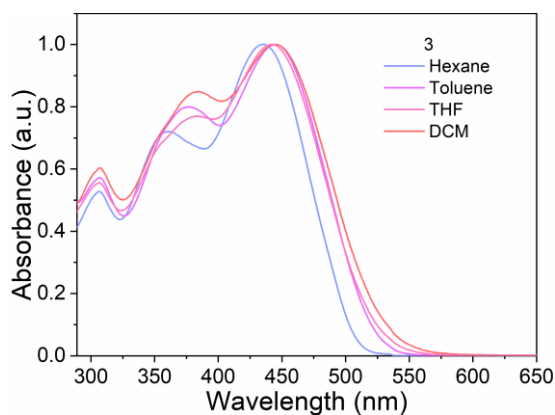

Figure S12. Normalized absorption spectra of **3** in different solvents. The concentration is 10  $\mu\text{M}$ .

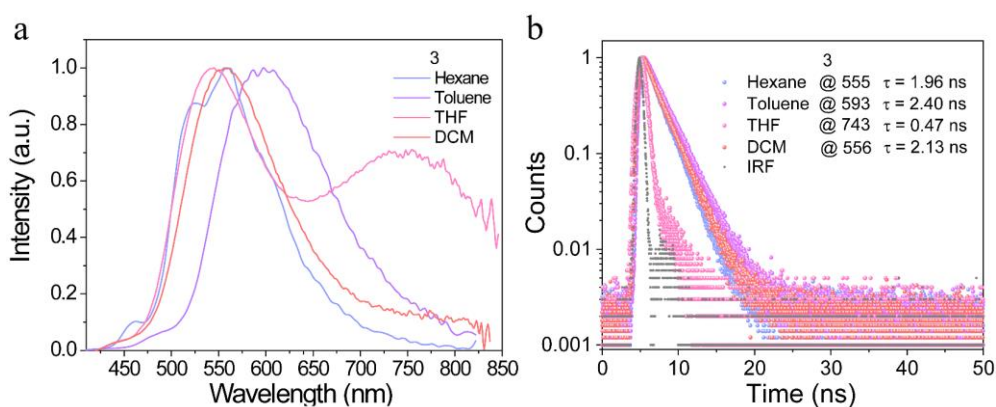

Figure S13. (a) Fluorescence (measured by PMT detector) spectra and (b) fluorescence decay of **3** in different solvents. The concentration is 10  $\mu\text{M}$ . The excitation wavelength is 380 nm.

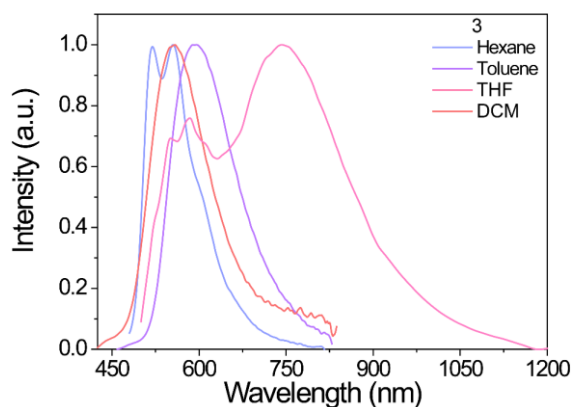

Figure S14. Normalized fluorescence spectra of **3** in different solvents at room temperature. The excitation wavelength is 380 nm. The concentration is 10  $\mu\text{M}$ . The emissions in hexane, toluene, and DCM were measured by PMT detector, and the emission of **3** in THF was measured by NIR detector.

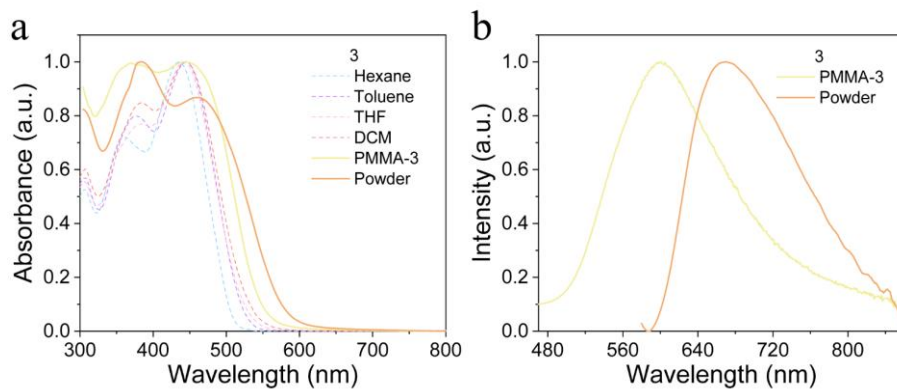

Figure S15. (a) Normalized absorption spectra of **3** in different states. The concentration is 10  $\mu\text{M}$ . (b) Normalized fluorescence spectra of **3** in different states at room temperature. The excitation wavelength is 450 nm.

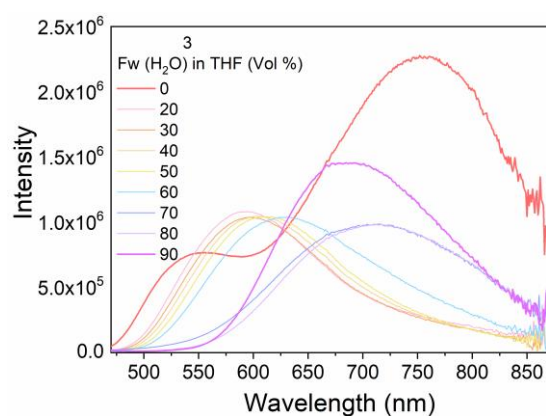

Figure S16. Fluorescence spectra of compound **2** (10  $\mu\text{M}$ ) in THF/ $\text{H}_2\text{O}$  with different water fractions. The excitation wavelength is 450 nm.

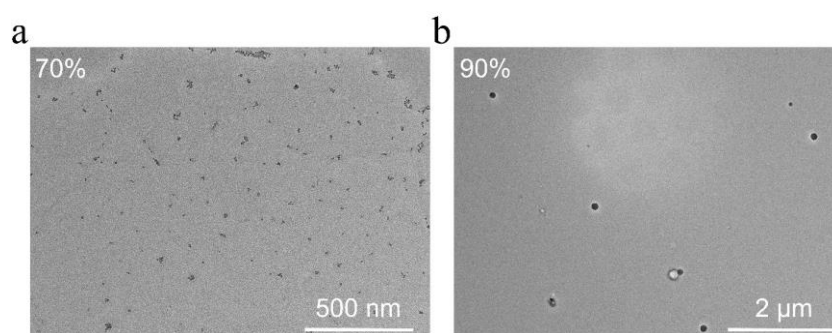

Figure S17. TEM images of compound **3** in THF/ $\text{H}_2\text{O}$  with water fractions of 70% (a) and 90% (b).

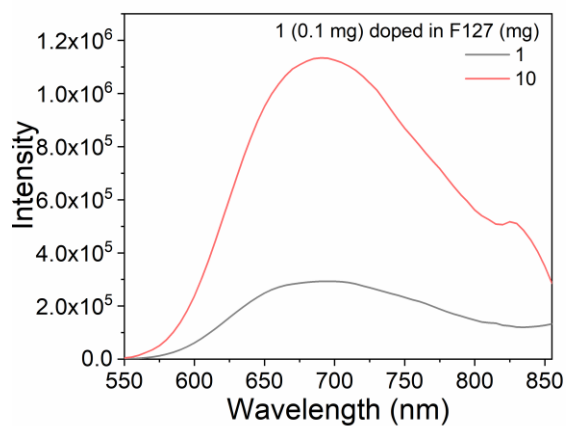

Figure S18. Fluorescence spectra of 0.1 mg compound **1** doping in different weight F127 upon 450 nm excitation at room temperature. The concentration is 10  $\mu$ M.

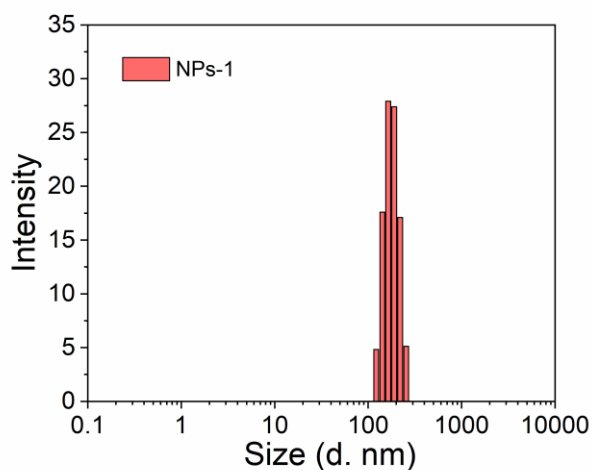

Figure S19. DLS of 0.1 mg compound **1** doping with 10 mg F127 in water. The concentration is 10  $\mu$ M.

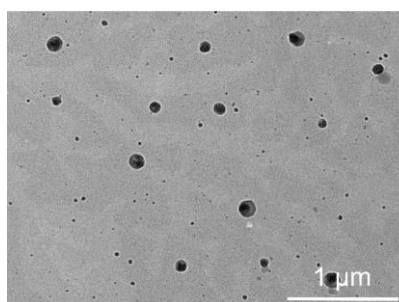

Figure S20. TEM image of 0.1 mg compound **1** doping with 10 mg F127 in water. The concentration is 10  $\mu$ M.

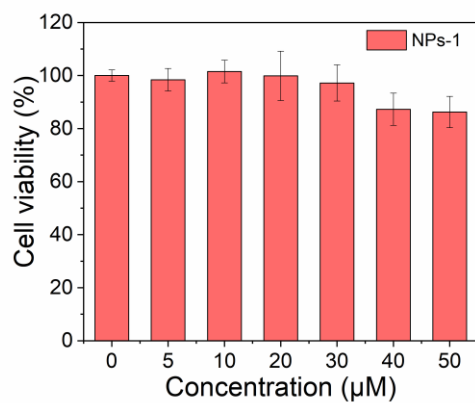

Figure S21. Cytotoxicity of NPs-1 to HeLa cells. Cellular internalization time is 24 hours at 37 °C.

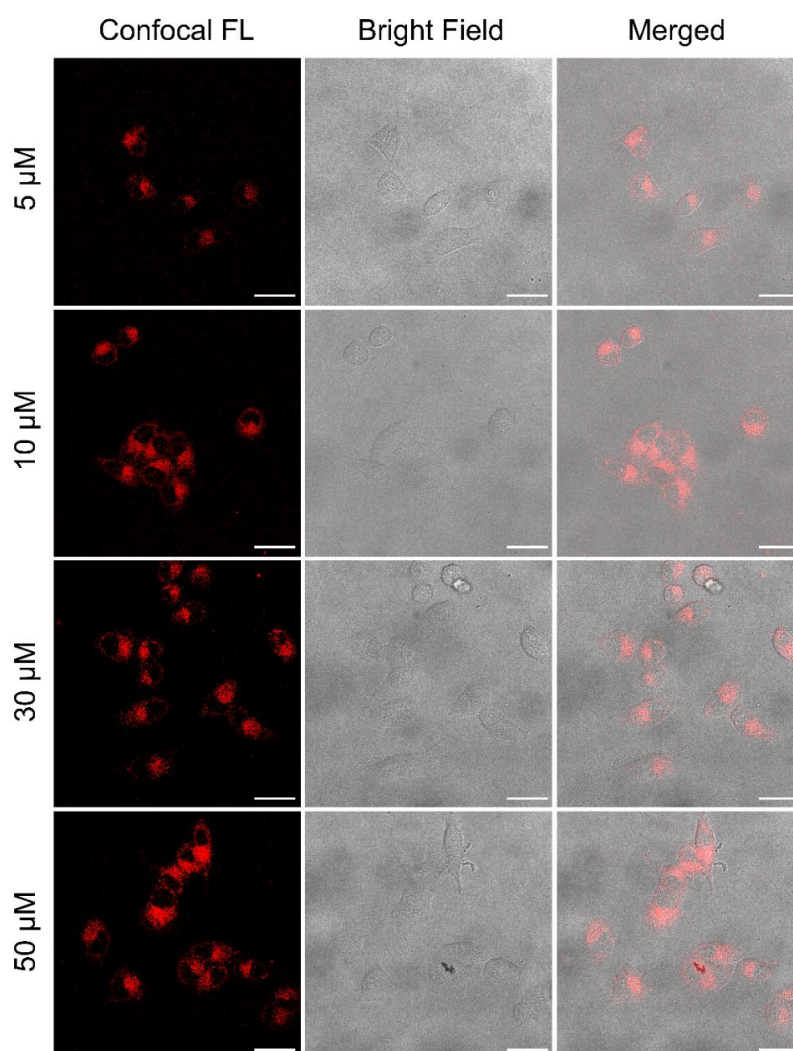

Figure S22. Confocal fluorescence images of HeLa cells incubated with NPs-1 in different concentrations for 4 hours at 37 °C obtained under 405 nm excitation. Scale bar = 30 µm.



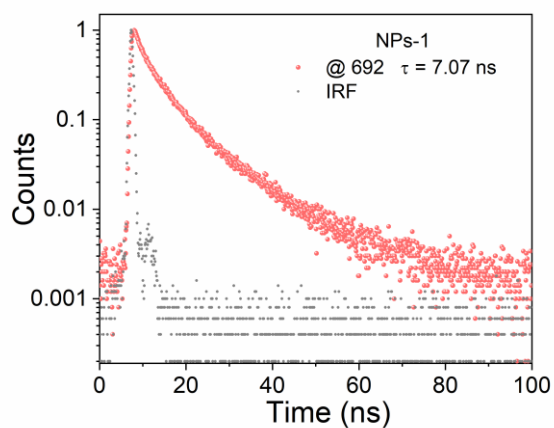

Figure S23. Fluorescence decay of NPs-1 in water at room temperature. The excitation wavelength is 405 nm. The concentration of the solution is 10  $\mu$ M.

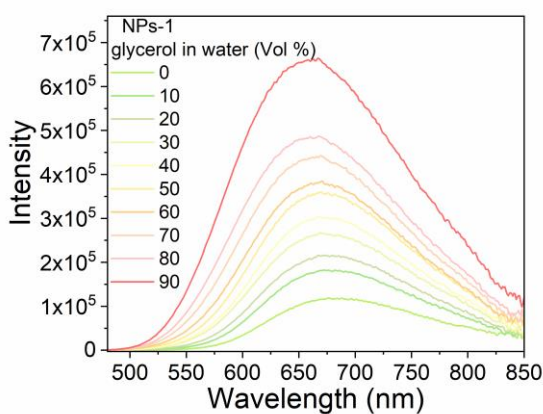

Figure S24. Fluorescence spectra of NPs-1 (10  $\mu$ M) in glycerol/H<sub>2</sub>O with different viscosities. The excitation wavelength is 405 nm.

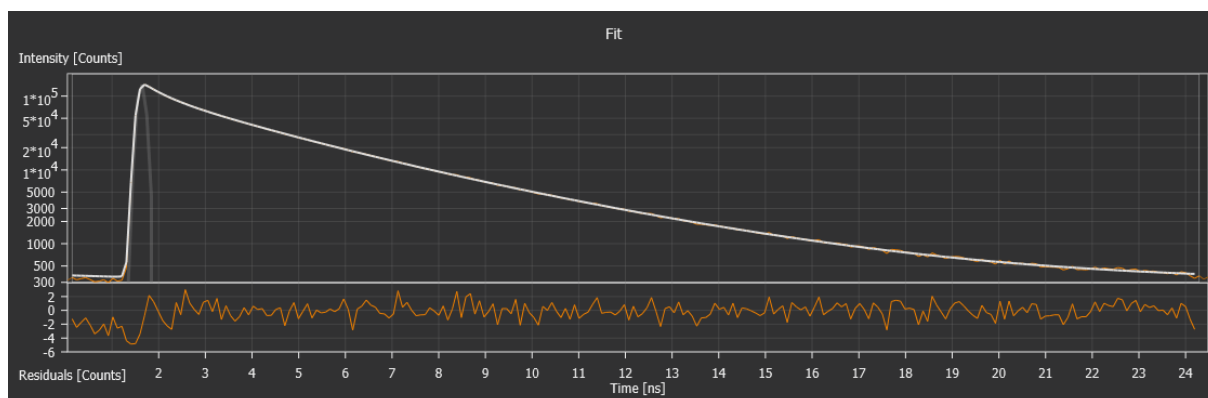

Figure S25. The fluorescence lifetime of HeLa cells incubated with NPs-1 for 4 h at 37°C obtained following 405 nm excitation.

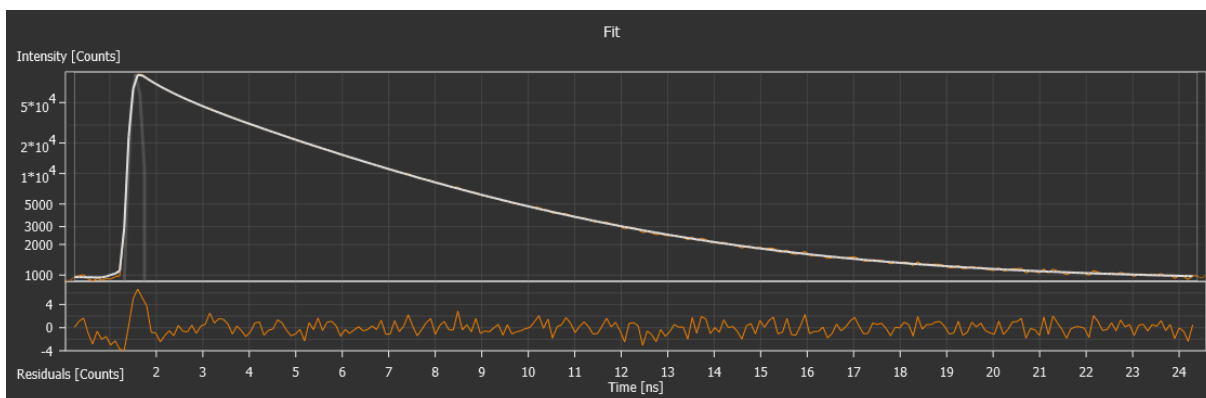

Figure S26. Fluorescence lifetime of HeLa cells pretreated with nystatin for 30 min and then stained with NPs-1 for 4 h at 37°C obtained following 405 nm excitation.

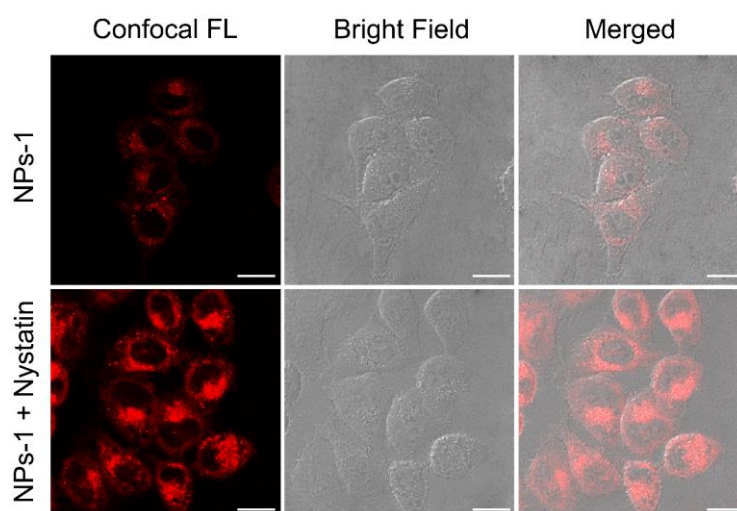

Figure S27. Confocal fluorescence images of HeLa cells incubated with NPs-1 and HeLa cells pretreated with nystatin for 30 min and then stained with NPs-1 for 4 hours at 37 °C obtained under 405 nm excitation. Scale bar = 15  $\mu$ m.

## 5. Additional tables

**Table S1.** Photophysical data of compounds **1-3** in solution state.

| Compounds | Solvents | $\lambda_{\text{abs, max}}$<br>(nm) | $\lambda_{\text{em, max}}$<br>(nm) | Stokes shift<br>(nm) | Fluorescence<br>lifetime (ns) | Quantum<br>yield (%) |
|-----------|----------|-------------------------------------|------------------------------------|----------------------|-------------------------------|----------------------|
| <b>1</b>  | Hexane   | 436                                 | 555                                | 119                  | 1.95                          | 80.3                 |
|           | Toluene  | 444                                 | 593                                | 149                  | 2.41                          | 60.6                 |
|           | THF      | 444                                 | 757                                | 313                  | 0.57                          | 8.2                  |
|           | DCM      | 446                                 | 811                                | 365                  | 0.31                          | 1.9                  |
| <b>2</b>  | Hexane   | 432                                 | 557                                | 125                  | 1.99                          | 89.1                 |
|           | Toluene  | 448                                 | 624                                | 176                  | 2.45                          | 36.9                 |
|           | THF      | 448                                 | 804                                | 356                  | 0.29                          | 1.8                  |
|           | DCM      | 448                                 | 831                                | 383                  | 0.29                          | 2.2                  |
| <b>3</b>  | Hexane   | 435                                 | 555                                | 120                  | 1.96                          | 81.2                 |
|           | Toluene  | 443                                 | 593                                | 150                  | 2.40                          | 53.8                 |
|           | THF      | 443                                 | 743                                | 300                  | 0.27                          | 9.6                  |
|           | DCM      | 445                                 | 556                                | 111                  | 2.13                          | 3.2                  |

**Table S2.** Photophysical data of compounds **1-3** in powder state.

| Powder   | $\lambda_{\text{em, max}}$<br>(nm) | Fluorescence<br>lifetime (ns) | Quantum<br>yield (%) |
|----------|------------------------------------|-------------------------------|----------------------|
| <b>1</b> | 654                                | 7.28                          | 10.7                 |
| <b>2</b> | 666                                | 3.44                          | 1.4                  |
| <b>3</b> | 670                                | 3.36                          | 2.3                  |

**Table S3.** Computed vertical excitations of **1** in different solvent media within the PCM solvent model using the TDDFT/B3LYP/6-31G(d) theoretical level. Absorption wavelengths, energies and their corresponding oscillator strength values of each vertical excitations (S<sub>1</sub>-S<sub>5</sub>) in different solvents are listed and compared with the experimental results.

| Solvents                         | Excitation states | Wavelength (nm) | Energy (eV) | Oscillator strength | Experiment (nm) |
|----------------------------------|-------------------|-----------------|-------------|---------------------|-----------------|
| Hexane<br>( $\epsilon=1.8819$ )  | S <sub>1</sub>    | 598             | 2.07        | 0.8273              | 436             |
|                                  | S <sub>2</sub>    | 446             | 2.78        | 1.3921              |                 |
|                                  | S <sub>3</sub>    | 432             | 2.87        | 0.1527              | 358             |
|                                  | S <sub>4</sub>    | 361             | 3.43        | 0.0913              | 305             |
|                                  | S <sub>5</sub>    | 342             | 3.63        | 0.2253              |                 |
| Toluene<br>( $\epsilon=2.3741$ ) | S <sub>1</sub>    | 604             | 2.05        | 0.8440              | 444             |
|                                  | S <sub>2</sub>    | 449             | 2.76        | 1.3560              |                 |
|                                  | S <sub>3</sub>    | 434             | 2.86        | 0.1962              | 374             |
|                                  | S <sub>4</sub>    | 362             | 3.42        | 0.0900              | 305             |
|                                  | S <sub>5</sub>    | 343             | 3.62        | 0.2366              |                 |
| THF<br>( $\epsilon=7.4257$ )     | S <sub>1</sub>    | 611             | 2.03        | 0.8004              | 444             |
|                                  | S <sub>2</sub>    | 453             | 2.74        | 1.2592              |                 |
|                                  | S <sub>3</sub>    | 435             | 2.85        | 0.3117              | 378             |
|                                  | S <sub>4</sub>    | 364             | 3.41        | 0.0942              | 305             |
|                                  | S <sub>5</sub>    | 343             | 3.61        | 0.2339              |                 |
| DCM<br>( $\epsilon=8.93$ )       | S <sub>1</sub>    | 612             | 2.02        | 0.8042              | 446             |
|                                  | S <sub>2</sub>    | 453             | 2.74        | 1.2472              |                 |
|                                  | S <sub>3</sub>    | 435             | 2.85        | 0.3248              | 381             |
|                                  | S <sub>4</sub>    | 364             | 3.41        | 0.0933              | 305             |
|                                  | S <sub>5</sub>    | 343             | 3.61        | 0.2360              |                 |

**Table S4.** Computed vertical excitations of **2** in different solvent media within the PCM solvent model using the TDDFT/B3LYP/6-31G(d) theoretical level. Absorption wavelengths, energies and their corresponding oscillator strength values of each vertical excitations (S<sub>1</sub>-S<sub>4</sub>) in different solvents are listed and compared with the experimental results.

| Solvents                         | Excitation states | Wavelength (nm) | Energy (eV) | Oscillator strength | Experiment (nm) |
|----------------------------------|-------------------|-----------------|-------------|---------------------|-----------------|
| Hexane<br>( $\epsilon=1.8819$ )  | S <sub>1</sub>    | 585             | 2.12        | 0.8695              | 432             |
|                                  | S <sub>2</sub>    | 421             | 2.95        | 1.2981              |                 |
|                                  | S <sub>3</sub>    | 403             | 3.07        | 0.1712              | 351             |
|                                  | S <sub>4</sub>    | 342             | 3.63        | 0.0194              |                 |
| Toluene<br>( $\epsilon=2.3741$ ) | S <sub>1</sub>    | 594             | 2.09        | 0.8851              | 448             |
|                                  | S <sub>2</sub>    | 424             | 2.92        | 1.3054              |                 |
|                                  | S <sub>3</sub>    | 407             | 3.05        | 0.1677              | 364             |
|                                  | S <sub>4</sub>    | 343             | 3.62        | 0.0235              |                 |
| THF<br>( $\epsilon=7.4257$ )     | S <sub>1</sub>    | 611             | 2.03        | 0.8232              | 448             |
|                                  | S <sub>2</sub>    | 430             | 2.88        | 1.2916              |                 |
|                                  | S <sub>3</sub>    | 411             | 3.02        | 0.2073              | 365             |
|                                  | S <sub>4</sub>    | 345             | 3.59        | 0.0354              |                 |
| DCM<br>( $\epsilon=8.93$ )       | S <sub>1</sub>    | 613             | 2.02        | 0.8257              | 448             |
|                                  | S <sub>2</sub>    | 431             | 2.88        | 1.2907              |                 |
|                                  | S <sub>3</sub>    | 412             | 3.01        | 0.2093              | 369             |
|                                  | S <sub>4</sub>    | 346             | 3.59        | 0.0363              |                 |

**Table S5.** Vertical (de)excitation  $S_1 \rightarrow S_0$  calculation of studied compounds at TD-DFT/B3LYP/6-31G(d) theoretical level.

| Compounds | Solvents                         | Wavelength (nm) | Energy (eV) | Oscillator strength | Experiment (nm) |
|-----------|----------------------------------|-----------------|-------------|---------------------|-----------------|
| <b>1</b>  | Hexane<br>( $\epsilon=1.8819$ )  | 686             | 1.81        | 0.9709              | 555             |
|           | Toluene<br>( $\epsilon=2.3741$ ) | 697             | 1.78        | 1.0557              | 593             |
|           | THF<br>( $\epsilon=7.4257$ )     | 737             | 1.68        | 1.3232              | 757             |
|           | DCM<br>( $\epsilon=8.93$ )       | 741             | 1.67        | 1.3496              | 811             |
| <b>2</b>  | Hexane<br>( $\epsilon=1.8819$ )  | 665             | 1.86        | 1.0038              | 557             |
|           | Toluene<br>( $\epsilon=2.3741$ ) | 680             | 1.82        | 1.0735              | 624             |
|           | THF<br>( $\epsilon=7.4257$ )     | 733             | 1.69        | 1.3142              | 804             |
|           | DCM<br>( $\epsilon=8.93$ )       | 739             | 1.68        | 1.3386              | 831             |
| <b>3</b>  | Hexane<br>( $\epsilon=1.8819$ )  | 691             | 1.79        | 0.9561              | 555             |
|           | Toluene<br>( $\epsilon=2.3741$ ) | 700             | 1.77        | 1.0441              | 593             |
|           | THF<br>( $\epsilon=7.4257$ )     | 738             | 1.68        | 1.3112              | 743             |
|           | DCM<br>( $\epsilon=8.93$ )       | 742             | 1.67        | 1.3369              | 556             |

**Table S6.** Representation of  $S_1 \rightarrow S_0$  charge transfer (CT) emission of **2** at TDDFT/B3LYP/6-31G(d) level.

| Solvents | HOMO | LUMO |
|----------|------|------|
| Hexane   |      |      |
| Toluene  |      |      |
| THF      |      |      |
| DCM      |      |      |

**Table S7.** The dipole moments (Debye) in ground state and different excited state.

| Compounds | Energy level state | Hexane  | Toluene | THF     | DCM     |
|-----------|--------------------|---------|---------|---------|---------|
| 1         | S <sub>0</sub>     | 9.1787  | 9.3988  | 10.0339 | 10.0914 |
|           | S <sub>1</sub>     | 11.9057 | 12.5377 | 14.3974 | 14.5812 |
|           | S <sub>2</sub>     | 11.9613 | 12.0816 | 13.0183 | 13.0790 |
| 2         | S <sub>0</sub>     | 11.4415 | 11.7660 | 12.7461 | 12.8333 |
|           | S <sub>1</sub>     | 11.9172 | 12.4609 | 14.3157 | 14.5017 |
|           | S <sub>2</sub>     | 8.0728  | 7.9935  | 7.5804  | 7.5293  |
| 3         | S <sub>0</sub>     | 9.3584  | 9.4977  | 10.0793 | 10.1286 |
|           | S <sub>1</sub>     | 11.8557 | 12.4723 | 14.3427 | 14.5240 |
|           | S <sub>2</sub>     | 11.8535 | 12.0370 | 12.7976 | 12.8667 |

**Table S8.** Vertical (de)excitation  $S_2 \rightarrow S_0$  calculation of studied compounds at TDDFT/B3LYP/6-31G(d) theoretical level. Here,  $S_2$  emission corresponds to HOMO-1 to LUMO transition.

| Compounds | Solvents                      | Wavelength (nm) | Energy (eV) | Oscillator strength | Experiment (nm) |
|-----------|-------------------------------|-----------------|-------------|---------------------|-----------------|
| <b>1</b>  | Hexane ( $\epsilon=1.8819$ )  | 531             | 2.34        | 1.2676              |                 |
|           | Toluene ( $\epsilon=2.3741$ ) | 540             | 2.29        | 1.2701              |                 |
|           | THF ( $\epsilon=7.4257$ )     | 581             | 2.14        | 1.3723              | 503             |
|           | DCM ( $\epsilon=8.93$ )       | 585             | 2.12        | 1.3759              | 568             |
| <b>2</b>  | Hexane ( $\epsilon=1.8819$ )  | 465             | 2.67        | 0.6596              |                 |
|           | Toluene ( $\epsilon=2.3741$ ) | 470             | 2.64        | 0.6388              |                 |
|           | THF ( $\epsilon=7.4257$ )     | 490             | 2.53        | 0.5517              | 558             |
|           | DCM ( $\epsilon=8.93$ )       | 492             | 2.52        | 0.5422              | 560             |
| <b>3</b>  | Hexane ( $\epsilon=1.8819$ )  | 531             | 2.34        | 1.2450              | 461             |
|           | Toluene ( $\epsilon=2.3741$ ) | 541             | 2.29        | 1.2594              | 483             |
|           | THF ( $\epsilon=7.4257$ )     | 579             | 2.14        | 1.3306              | 542             |
|           | DCM ( $\epsilon=8.93$ )       | 583             | 2.13        | 1.3361              | 556             |



**Table S9.** Representation of  $S_2 \rightarrow S_0$  charge transfer (CT+LE) emission of **1** at TDDFT/B3LYP/6-31G(d) level.

| Solvents | HOMO-1 | LUMO |
|----------|--------|------|
| Hexane   |        |      |
| Toluene  |        |      |
| THF      |        |      |
| DCM      |        |      |

**Table S10.** Representation of  $S_2 \rightarrow S_0$  charge transfer (CT+LE) emission of **2** at TDDFT/B3LYP/6-31G(d) level.

| Solvents | HOMO-1 | LUMO |
|----------|--------|------|
| Hexane   |        |      |
| Toluene  |        |      |
| THF      |        |      |
| DCM      |        |      |

**Table S11.** Computed vertical excitations of **3** in different solvent media within the PCM solvent model using the TDDFT/B3LYP/6-31G(d) theoretical level. Absorption wavelengths, energies and their corresponding oscillator strength values of each vertical excitations (S<sub>1</sub>-S<sub>5</sub>) in different solvents are listed and compared with the experimental results.

| Solvents                         | Excitation states | Wavelength (nm) | Energy (eV) | Oscillator strength | Experiment (nm) |
|----------------------------------|-------------------|-----------------|-------------|---------------------|-----------------|
| Hexane<br>( $\epsilon=1.8819$ )  | S <sub>1</sub>    | 601             | 2.06        | 0.8181              | 434             |
|                                  | S <sub>2</sub>    | 448             | 2.77        | 1.3939              |                 |
|                                  | S <sub>3</sub>    | 433             | 2.86        | 0.1627              | 358             |
|                                  | S <sub>4</sub>    | 362             | 3.43        | 0.0941              | 306             |
|                                  | S <sub>5</sub>    | 343             | 3.62        | 0.2250              |                 |
| Toluene<br>( $\epsilon=2.3741$ ) | S <sub>1</sub>    | 606             | 2.05        | 0.8340              | 445             |
|                                  | S <sub>2</sub>    | 450             | 2.75        | 1.3652              |                 |
|                                  | S <sub>3</sub>    | 435             | 2.85        | 0.1942              | 376             |
|                                  | S <sub>4</sub>    | 363             | 3.42        | 0.0939              | 306             |
|                                  | S <sub>5</sub>    | 343             | 3.61        | 0.2364              |                 |
| THF<br>( $\epsilon=7.4257$ )     | S <sub>1</sub>    | 612             | 2.03        | 0.7977              | 443             |
|                                  | S <sub>2</sub>    | 453             | 2.74        | 1.2637              |                 |
|                                  | S <sub>3</sub>    | 435             | 2.85        | 0.3163              | 381             |
|                                  | S <sub>4</sub>    | 364             | 3.41        | 0.0954              | 306             |
|                                  | S <sub>5</sub>    | 344             | 3.61        | 0.2229              |                 |
| DCM<br>( $\epsilon=8.93$ )       | S <sub>1</sub>    | 613             | 2.02        | 0.8013              | 443             |
|                                  | S <sub>2</sub>    | 453             | 2.73        | 1.2521              |                 |
|                                  | S <sub>3</sub>    | 435             | 2.85        | 0.3290              | 381             |
|                                  | S <sub>4</sub>    | 364             | 3.41        | 0.0946              | 306             |
|                                  | S <sub>5</sub>    | 344             | 3.61        | 0.2252              |                 |

**Table S12.** Representation of  $S_1 \rightarrow S_0$  charge transfer (CT) emission of **3** at TDDFT/B3LYP/6-31G(d) level.

| Solvents | HOMO                                                                               | LUMO                                                                                |
|----------|------------------------------------------------------------------------------------|-------------------------------------------------------------------------------------|
| Hexane   | 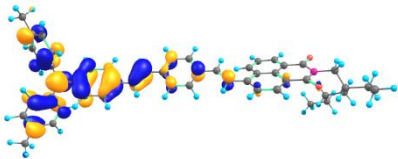  |   |
| Toluene  |   |   |
| THF      |   |   |
| DCM      |  |  |

**Table S13.** Representation of  $S_2 \rightarrow S_0$  charge transfer (CT+LE) emission of **3** at TDDFT/B3LYP/6-31G(d) level.

| Solvents | HOMO-1 | LUMO |
|----------|--------|------|
| Hexane   |        |      |
| Toluene  |        |      |
| THF      |        |      |
| DCM      |        |      |

## 6. NMR and HRMS spectra

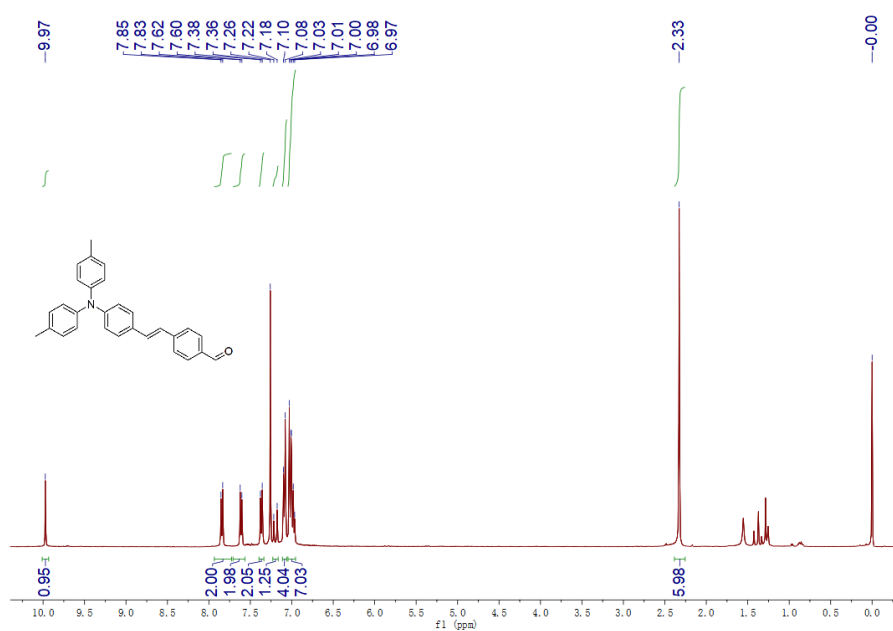

Figure S28.  $^1\text{H}$  NMR Spectrum of **1-1** in  $\text{CDCl}_3$ .

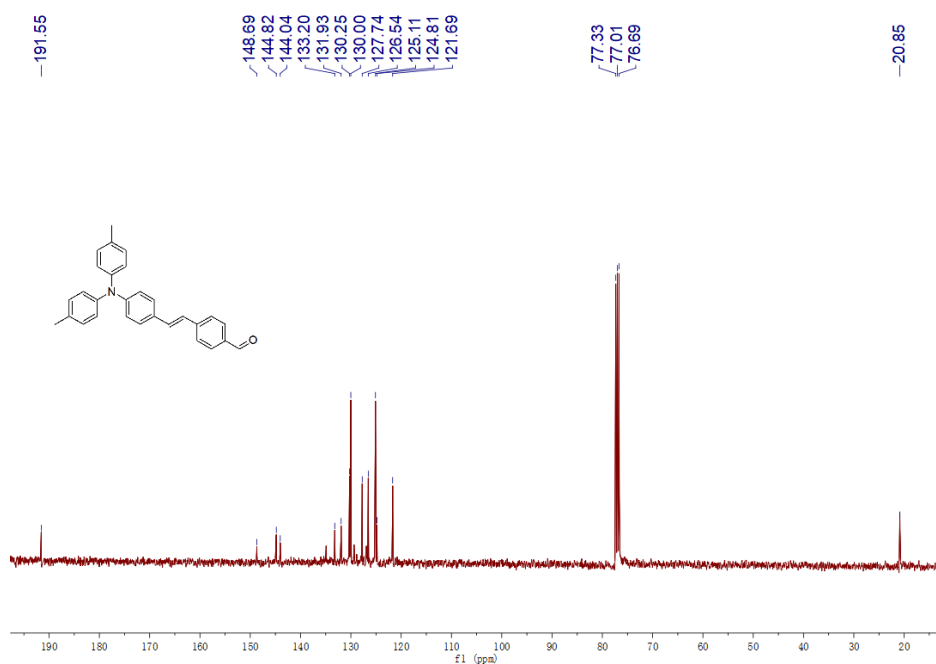

Figure S29.  $^{13}\text{C}$  NMR Spectrum of **1-1** in  $\text{CDCl}_3$ .

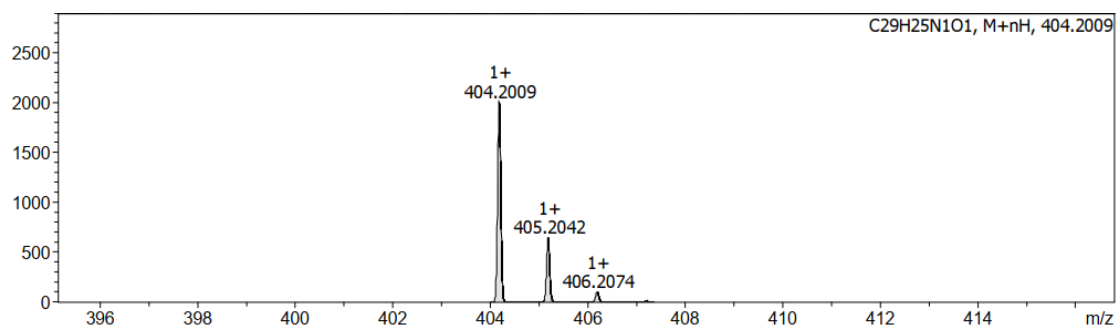

Figure S30. HRMS Spectrum of **1-1**.

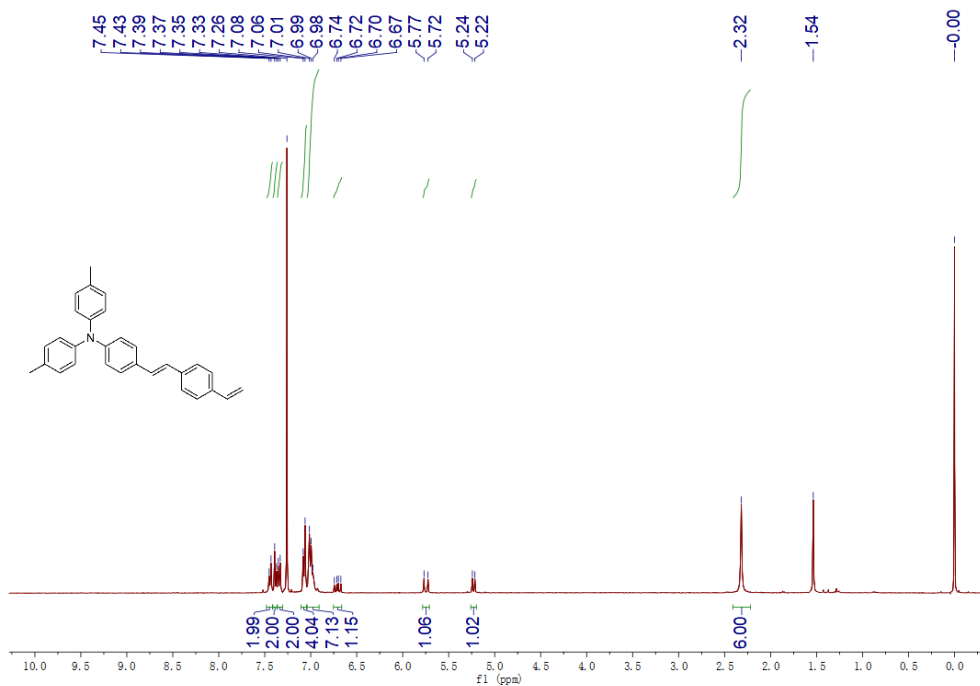

Figure S31.  $^1\text{H}$  NMR Spectrum of **1-2** in  $\text{CDCl}_3$ .

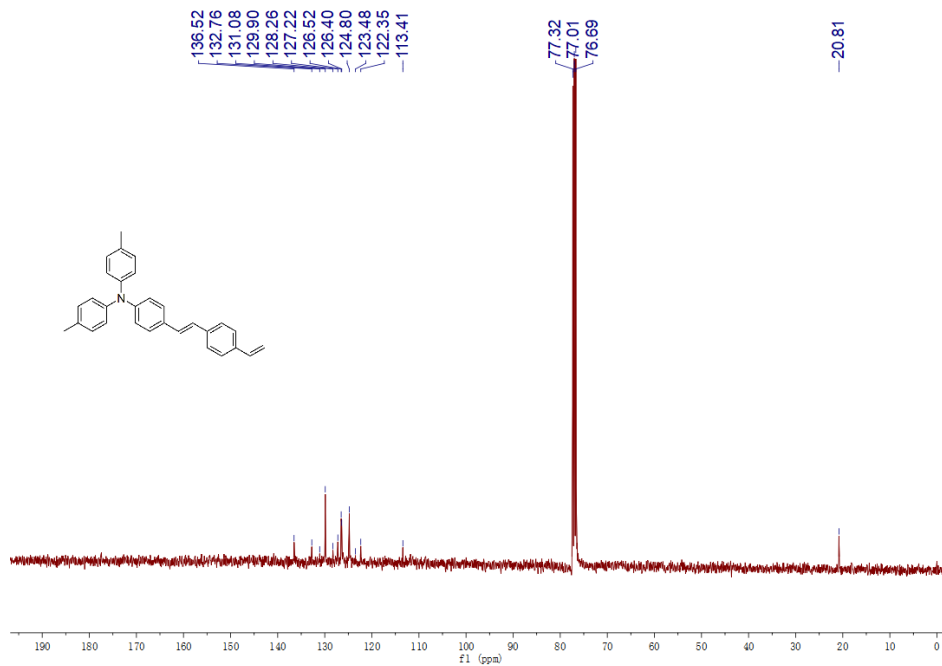

Figure S32.  $^{13}\text{C}$  NMR Spectrum of **1-2** in  $\text{CDCl}_3$ .

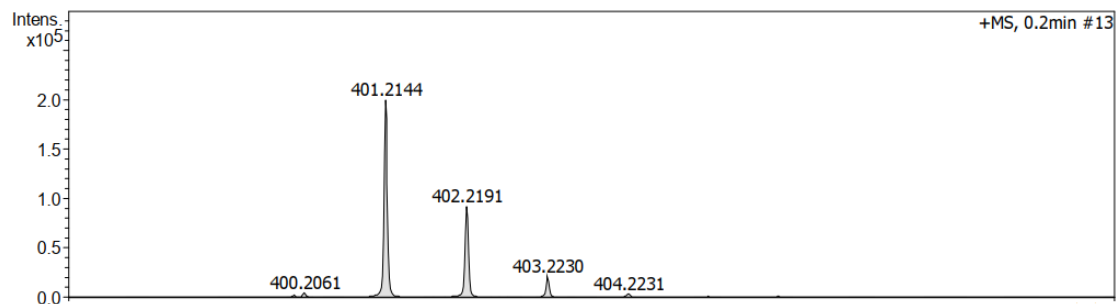

Figure S33. HRMS Spectrum of **1-2**.

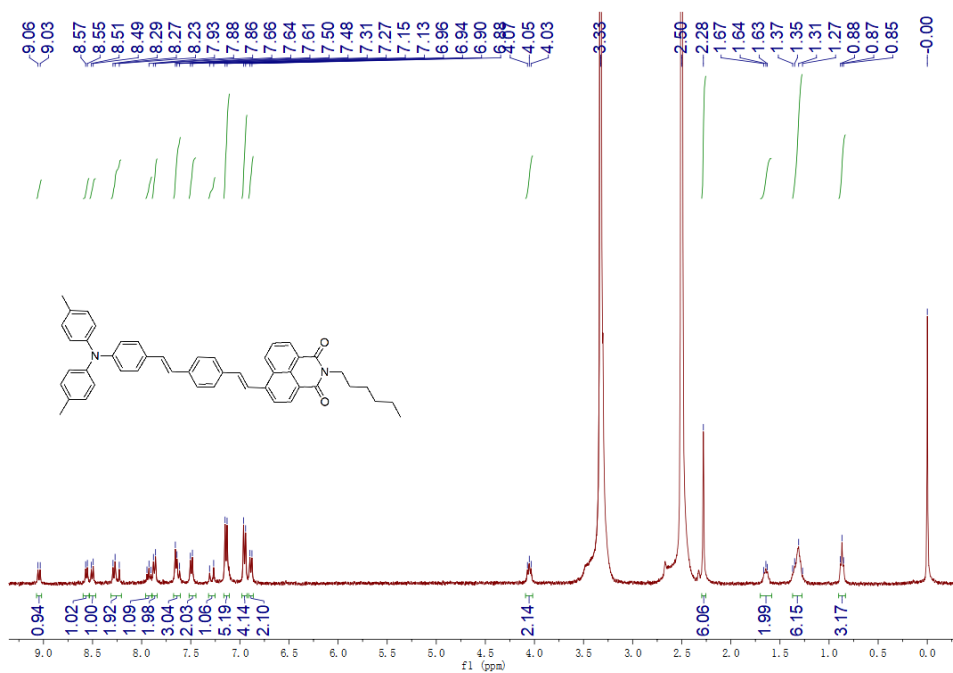

Figure S34.  $^1\text{H}$  NMR Spectrum of 1 in DMSO- $d_6$ .

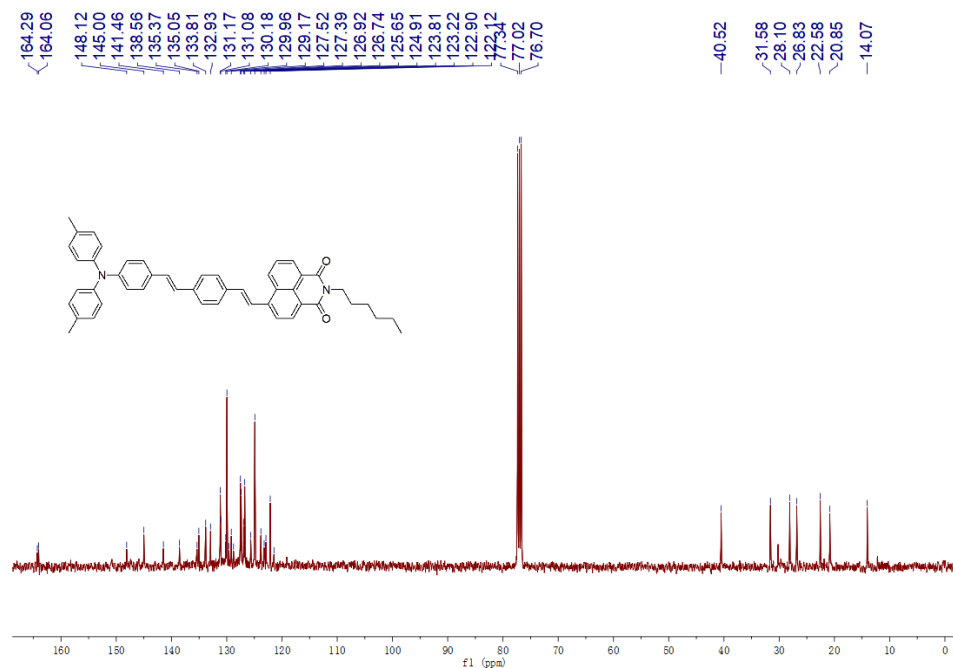

Figure S35.  $^{13}\text{C}$  NMR Spectrum of 1 in  $\text{CDCl}_3$ .

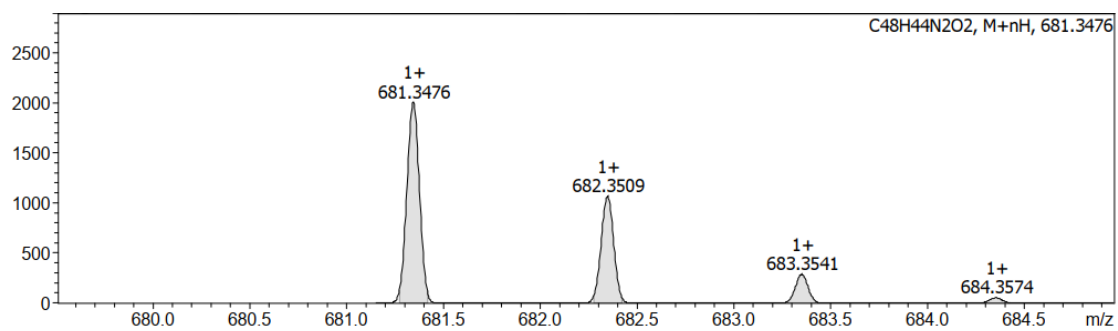

Figure S36. HRMS Spectrum of 1.

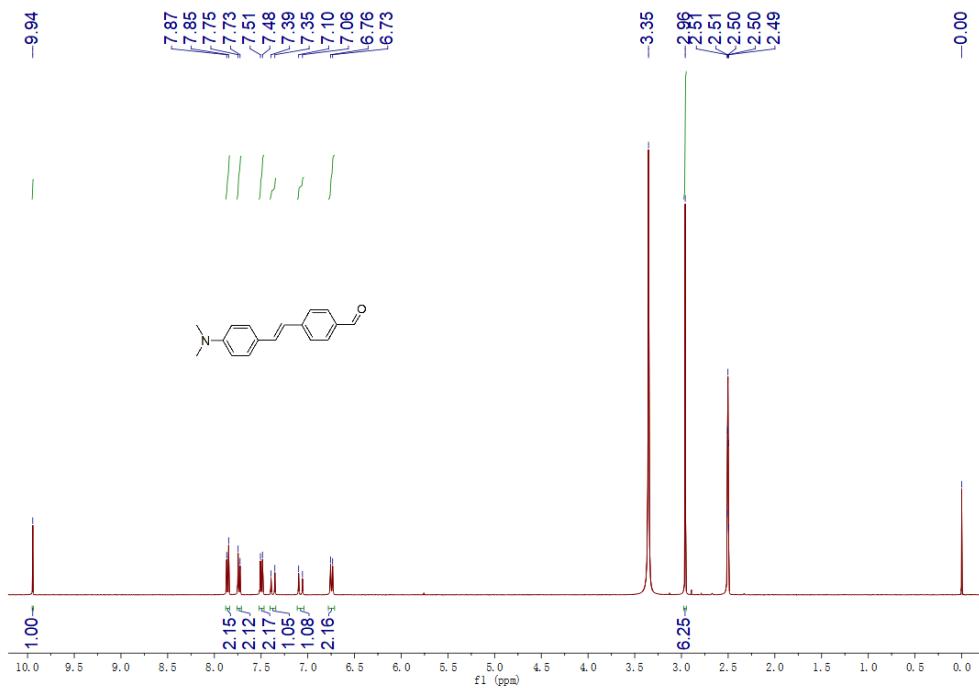

Figure S37. <sup>1</sup>H NMR Spectrum of 2-1 in DMSO-d<sub>6</sub>.

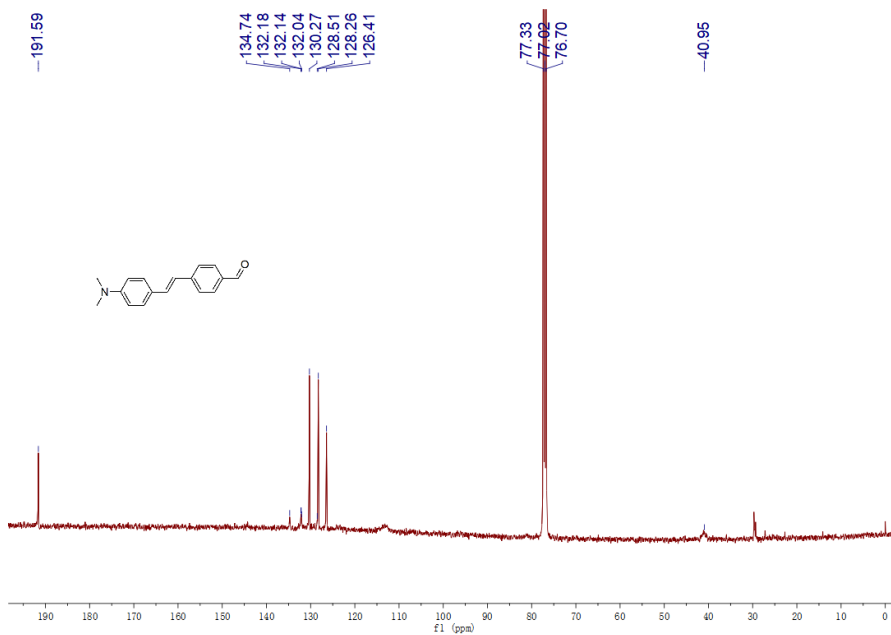

Figure S38. <sup>13</sup>C NMR Spectrum of 2-1 in CDCl<sub>3</sub>.

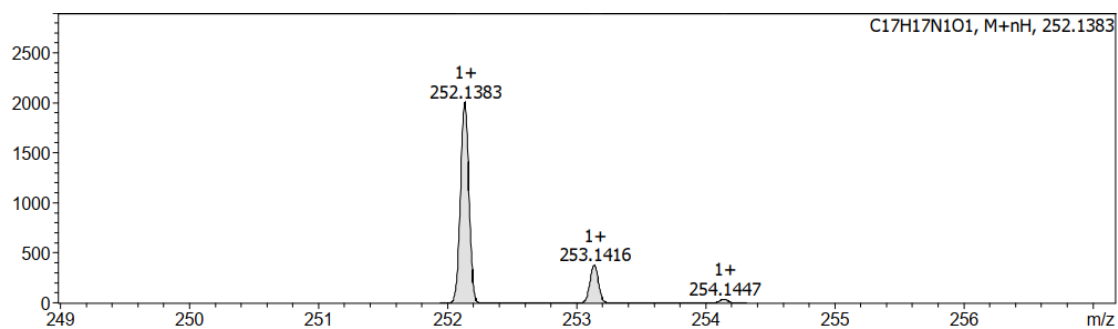

Figure S39. HRMS Spectrum of 2-1.



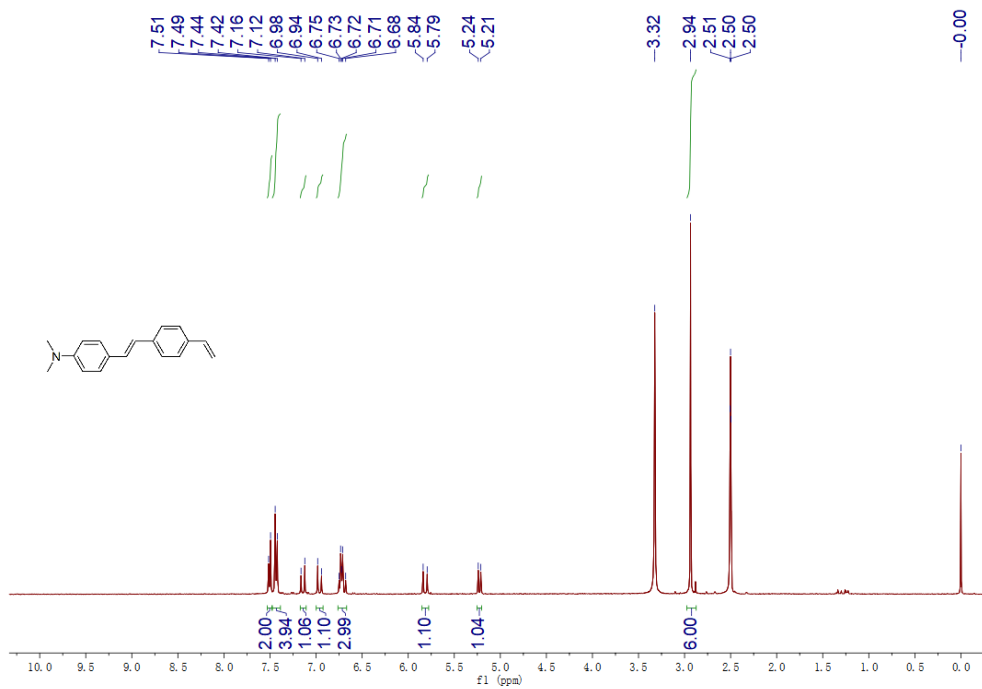

Figure S40.  $^1\text{H}$  NMR Spectrum of **2-2** in  $\text{DMSO-d}_6$ .

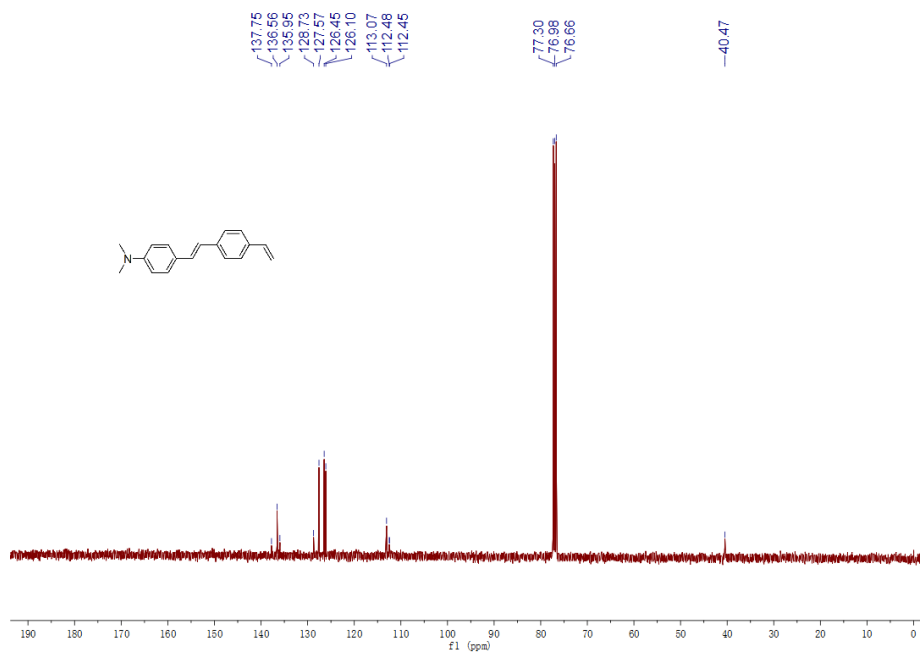

Figure S41.  $^{13}\text{C}$  NMR Spectrum of **2-2** in  $\text{CDCl}_3$ .

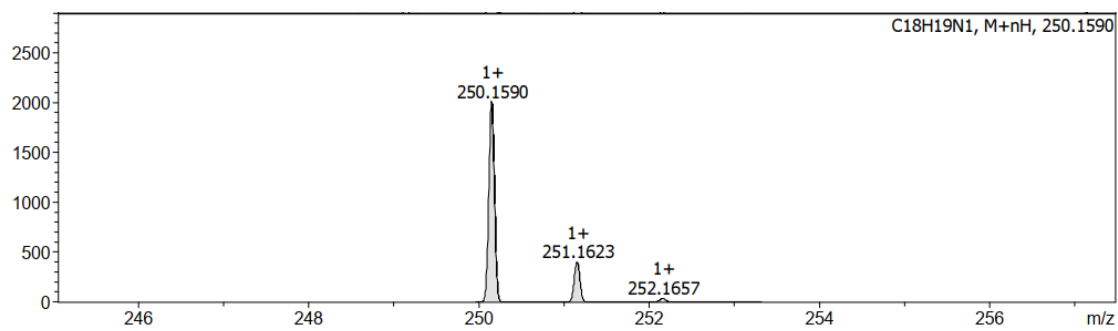

Figure S42. HRMS Spectrum of **2-2**.

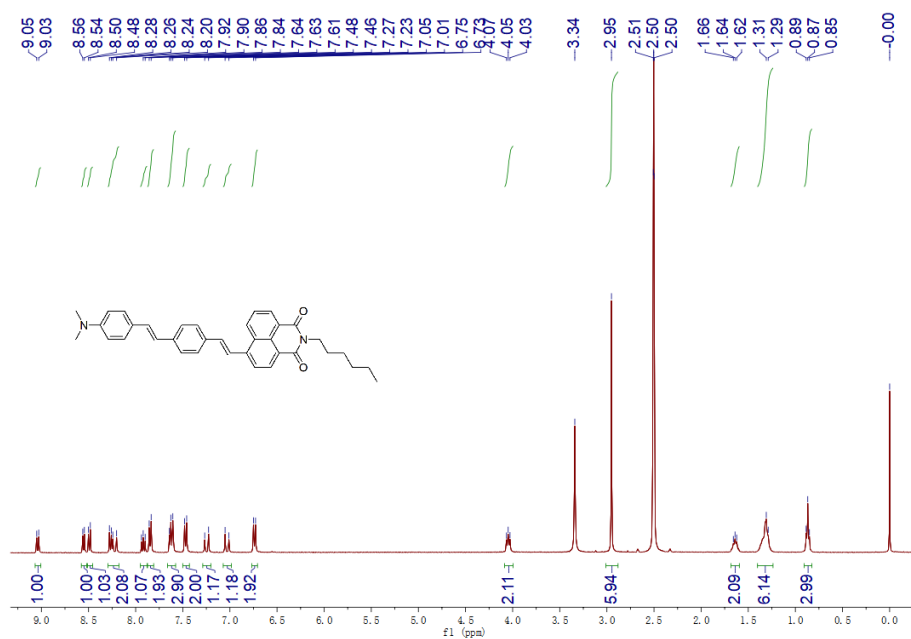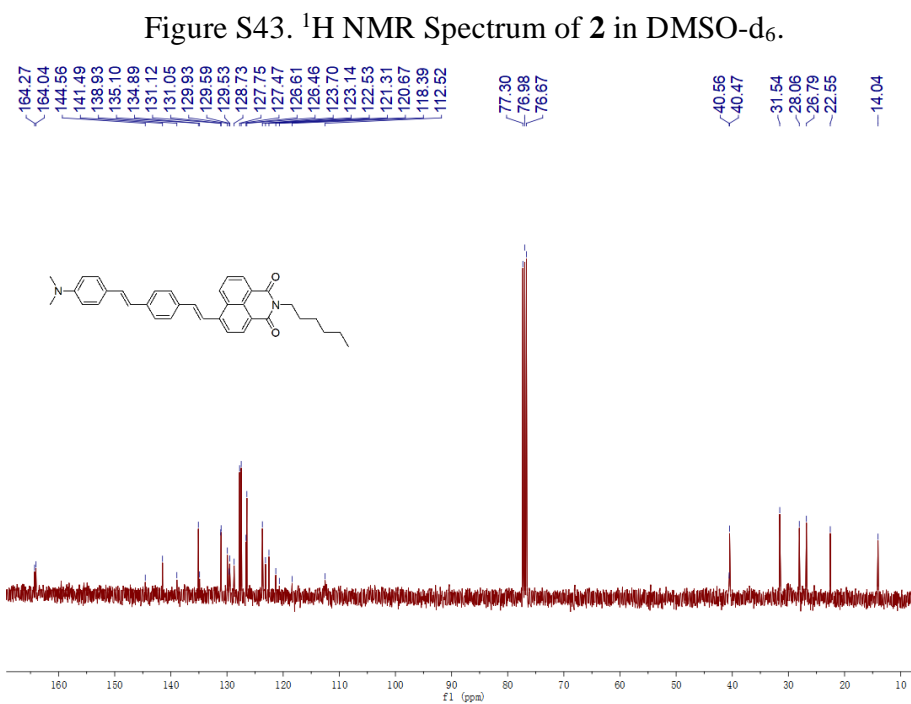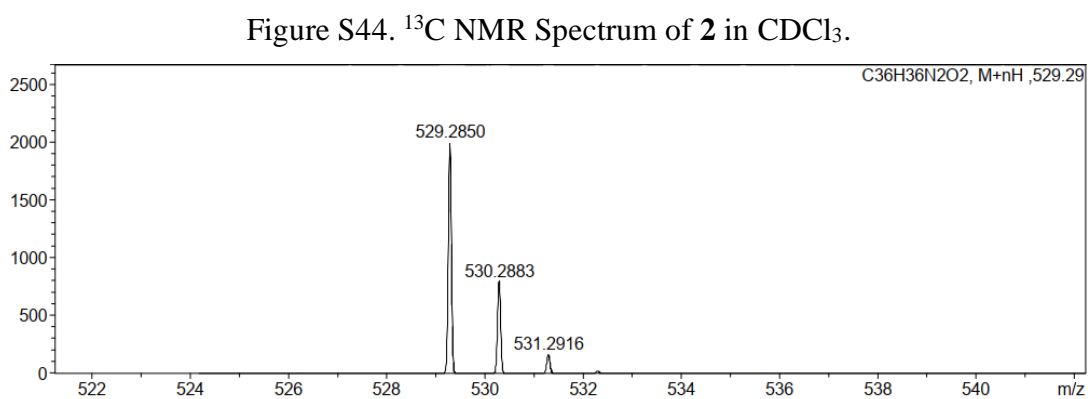

Figure S45. HRMS Spectrum of 2.

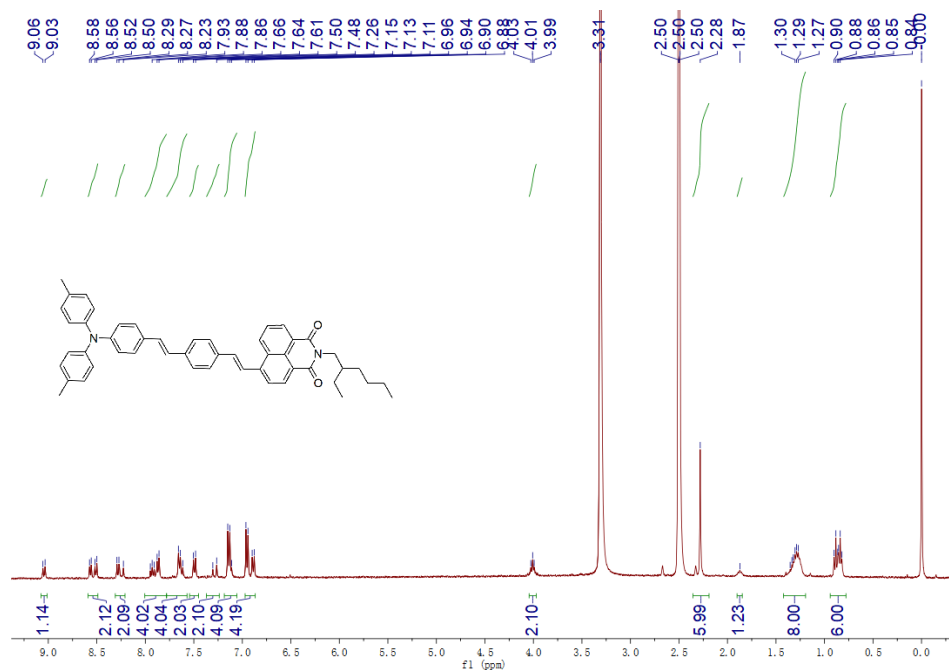

Figure S46. <sup>1</sup>H NMR Spectrum of **3** in DMSO-d<sub>6</sub>.

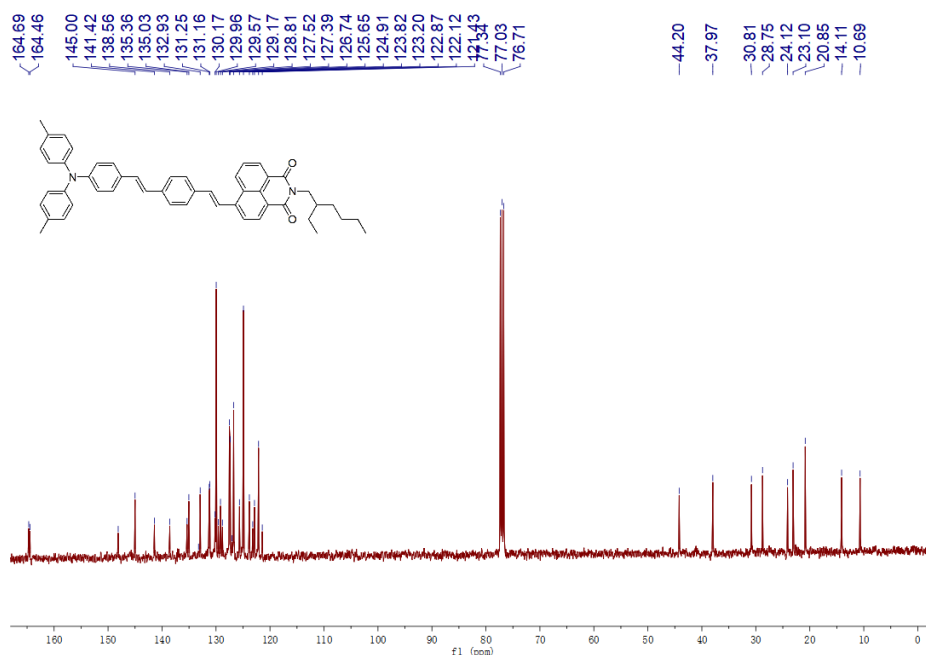

Figure S47. <sup>13</sup>C NMR Spectrum of **3** in CDCl<sub>3</sub>.

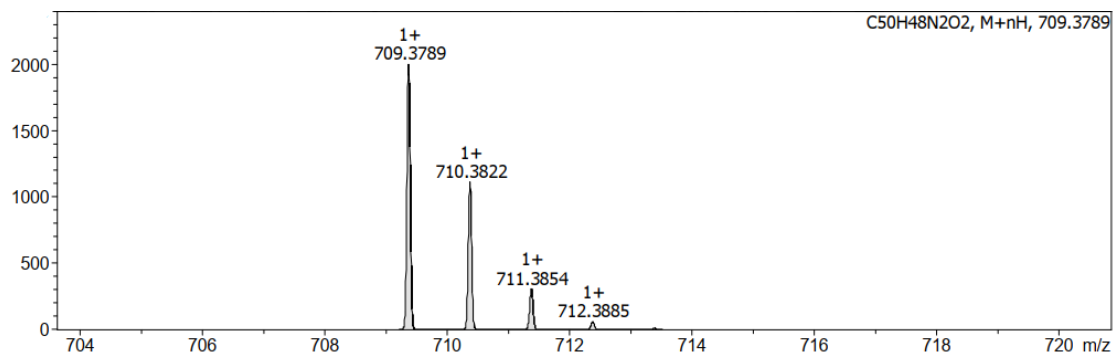

Figure S48. HRMS Spectrum of **3**.

## 7. References

1. W. Ren, H. Zhuang, Q. Bao, S. Miao, H. Li, J. Lu and L. Wang, *Dyes Pigm*, 2014, **100**, 127-134.
2. N. Meher, S. R. Chowdhury and P. K. Iyer, *J. Mater. Chem. B*, 2016, **4**, 6023-6031.
3. C. Lee, W. Yang and R. G. Parr, *Phys. Rev. B Condens. Matter.*, 1988, **37**, 785-789.
4. A. D. Becke, *J. Chem. Phys.*, 1993, **98**, 5648-5652.
5. R. f. Jin, S. S. Tang and W. D. Sun, *Tetrahedron*, 2014, **70**, 47-53.
6. R. Jin and S. Tang, *J. Mol. Model.*, 2013, **19**, 1685-1693.
7. B. Mohan, D. Sarkar, P. Raja Lakshmi, D. Umadevi and S. Shanmugaraju, *J. Photochem.*, 2023, **441**, 114727.
8. P. W. Abegg and T. K. Ha, *Mol. Phys.* 1974, **27**, 763-767.
9. P. W. Abegg, *Mol. Phys.* 1975, **30**, 579-596.
10. Gaussian 16, Revision C.01, M. J. Frisch, G. W. Trucks, H. B. Schlegel, G. E. Scuseria, M. A. Robb, J. R. Cheeseman, G. Scalmani, V. Barone, G. A. Petersson, H. Nakatsuji, X. Li, M. Caricato, A. V. Marenich, J. Bloino, B. G. Janesko, R. Gomperts, B. Mennucci, H. P. Hratchian, J. V. Ortiz, A. F. Izmaylov, J. L. Sonnenberg, D. Williams-Young, F. Ding, F. Lipparini, F. Egidi, J. Goings, B. Peng, A. Petrone, T. Henderson, D. Ranasinghe, V. G. Zakrzewski, J. Gao, N. Rega, G. Zheng, W. Liang, M. Hada, M. Ehara, K. Toyota, R. Fukuda, J. Hasegawa, M. Ishida, T. Nakajima, Y. Honda, O. Kitao, H. Nakai, T. Vreven, K. Throssell, J. A. Montgomery, Jr., J. E. Peralta, F. Ogliaro, M. J. Bearpark, J. J. Heyd, E. N. Brothers, K. N. Kudin, V. N. Staroverov, T. A. Keith, R. Kobayashi, J. Normand, K. Raghavachari, A. P. Rendell, J. C. Burant, S. S. Iyengar, J. Tomasi, M. Cossi, J. M. Millam, M. Klene, C. Adamo, R. Cammi, J. W. Ochterski, R. L. Martin, K. Morokuma, O. Farkas, J. B. Foresman, and D. J. Fox, Gaussian, Inc., Wallingford CT, **2016**.
